# Supplementary material for: Nitrogen-rich salts of 1-aminotetrazol-5-one: oxygen-containing insensitive energetic materials with high thermal stability
Source: Royal Society of Chemistry journal article supplement (doi:10.1039/c5ra07649h), 2015-01-01
Supplement: c5ra07649h1.pdf [file c5ra07649h1.pdf]

# 1-Aminotetrazol-5-one and its salts : a family of new insensitive nitrogen rich energetic compounds

Xin Yin<sup>[a]</sup>, Jian-Guo Zhang\*<sup>[a]</sup>, Xin Jin<sup>[a]</sup>, Cai-Xia Xu<sup>[a]</sup>, Piao He<sup>[a]</sup>, Tong Li<sup>[a]</sup>, Kun Wang<sup>[a]</sup>, Jian Qin<sup>[a]</sup>,  
and Jin-Ting Wu<sup>[a]</sup>

## Supporting Information

### Table of Contents

|                |                                                                      |
|----------------|----------------------------------------------------------------------|
| <b>S2-S14</b>  | <b>NMR, MS and IR Spectra for all energetic compounds</b>            |
| <b>S15</b>     | <b>Crystallographic data</b>                                         |
| <b>S16-S22</b> | <b>Packing diagram and Hydrogen bond for all energetic compounds</b> |
| <b>S23</b>     | <b>TG data</b>                                                       |

---

[a] Dr. X. Yin, Prof. J.-G. Zhang, X. Jin, Dr. C.-X. Xu, Dr. P. He,  
Dr. T. Li, Dr. K. Wang, Dr. J. Qin, J.-T. Wu.  
Department: State Key Laboratory of Explosion Science and  
Technology  
Institution: Beijing Institute of Technology, Beijing 100081 P. R.  
China  
E-mail: [zjgbit@bit.edu.cn](mailto:zjgbit@bit.edu.cn)  
Fax: +86-10-6891-8091

# NMR, MS and IR Spectra for all energetic compounds

## <sup>13</sup>C NMR

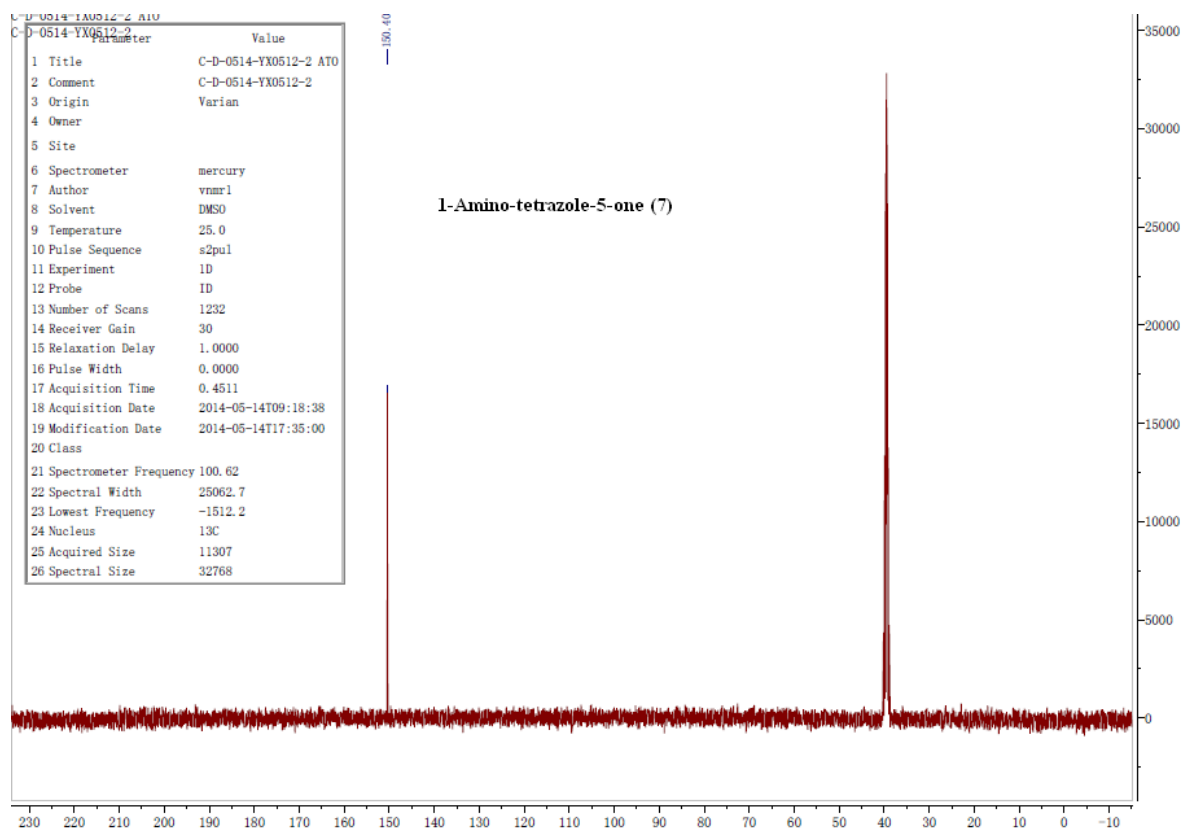

Figure S1. <sup>13</sup>C NMR of 7

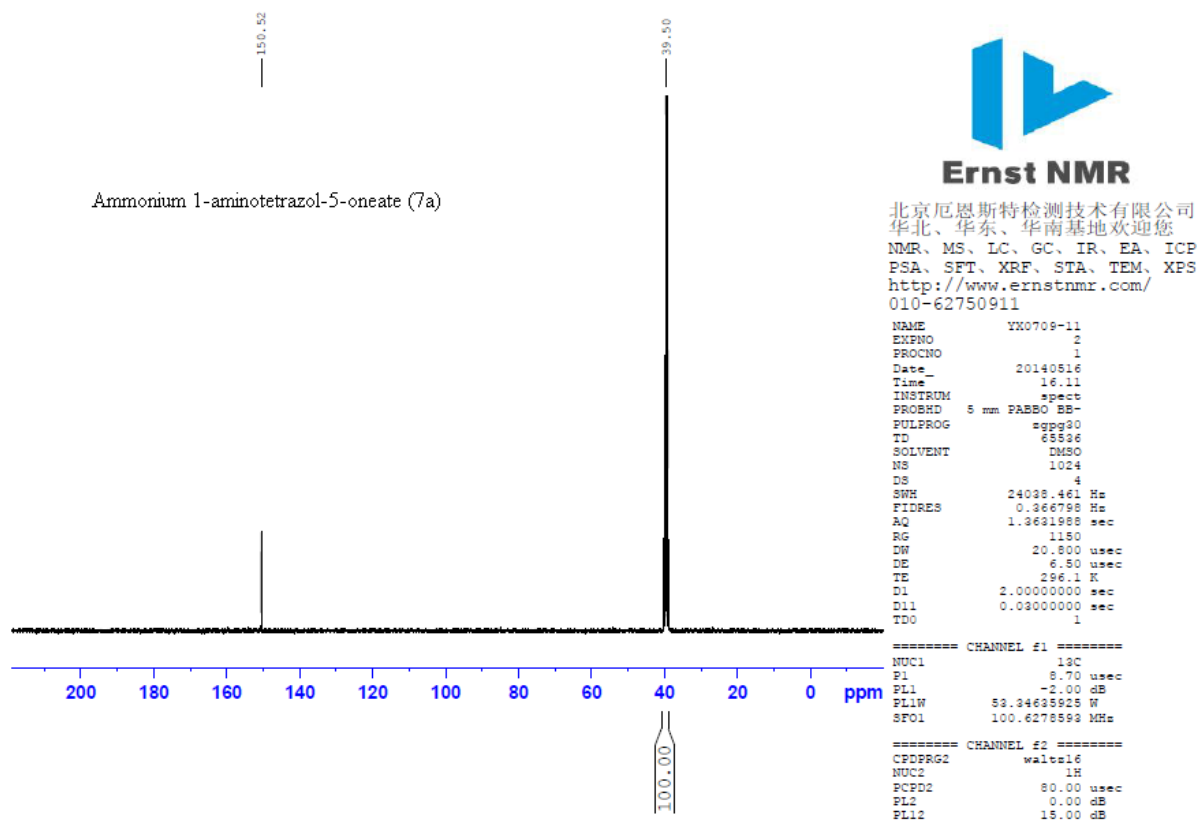

Figure S2. <sup>13</sup>C NMR of 7a

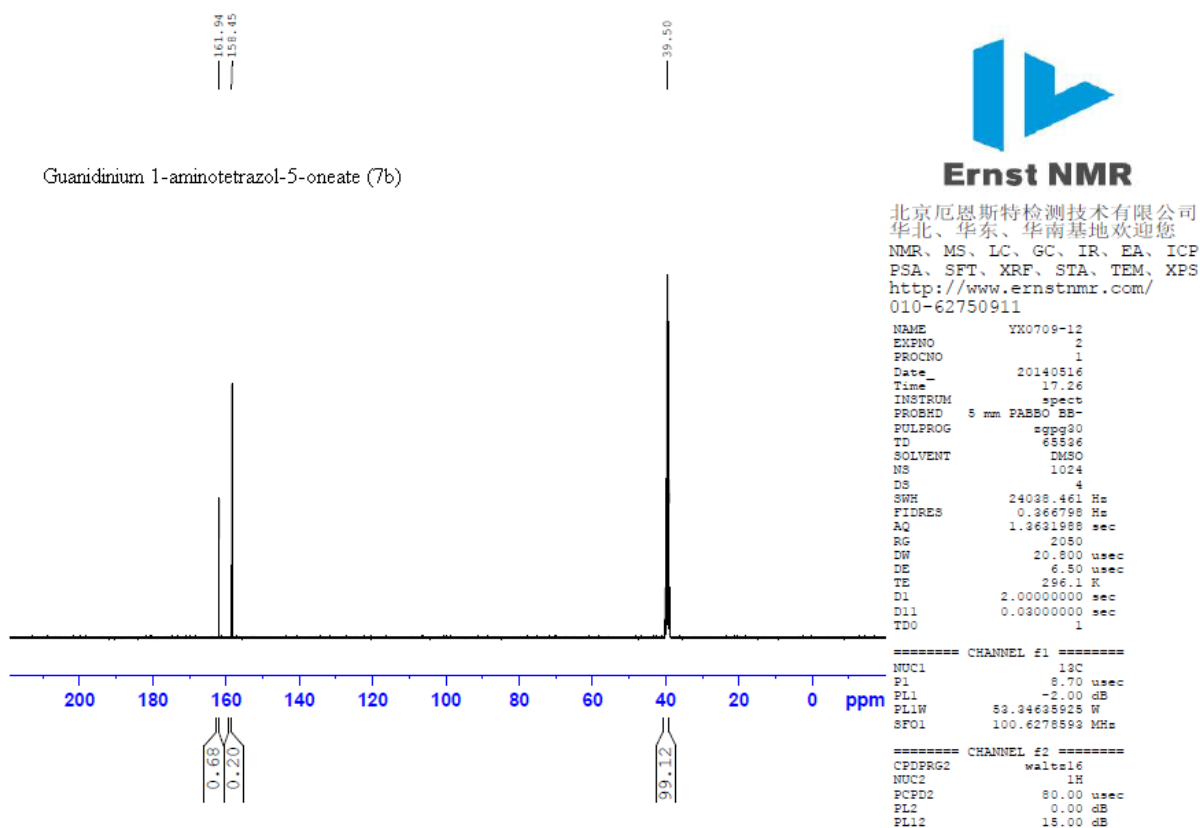

Figure S3. <sup>13</sup>C NMR of 7b

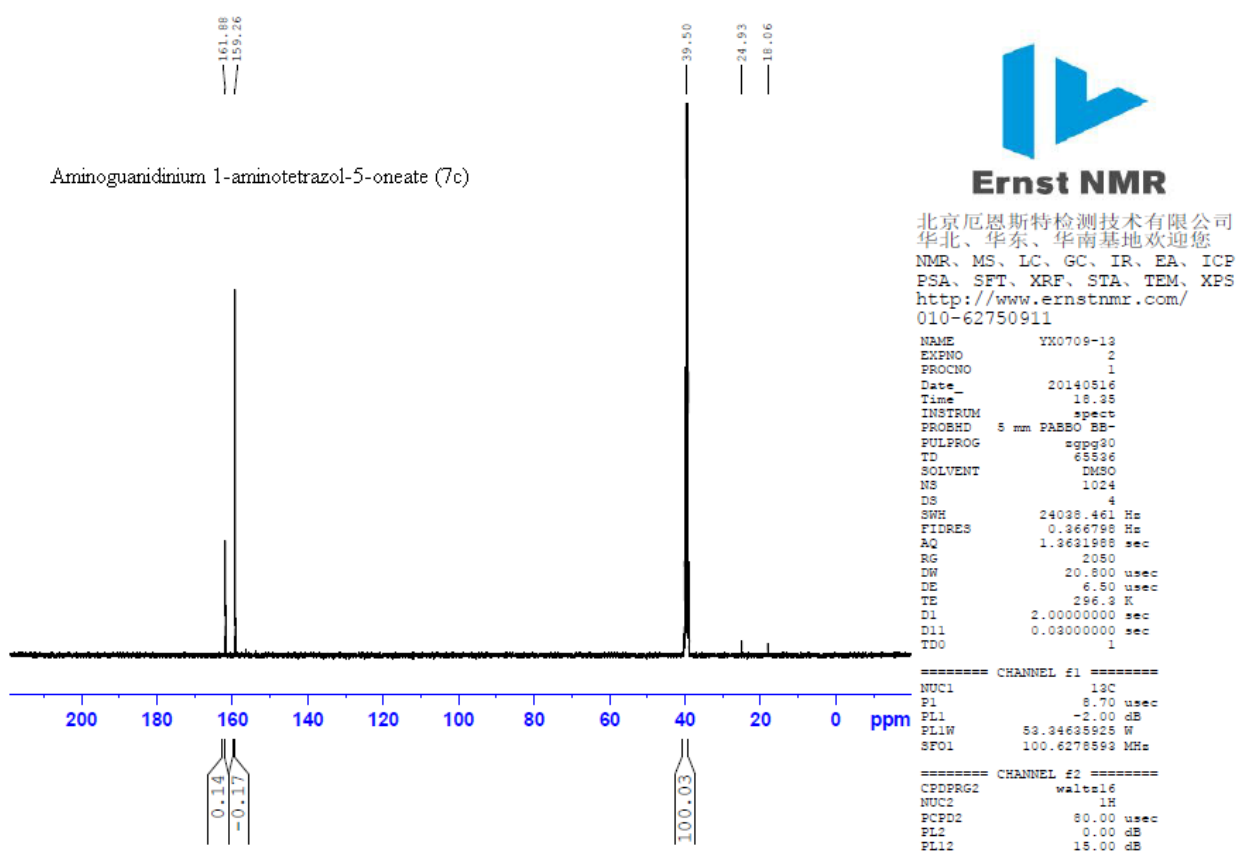

Figure S4. <sup>13</sup>C NMR of 7c

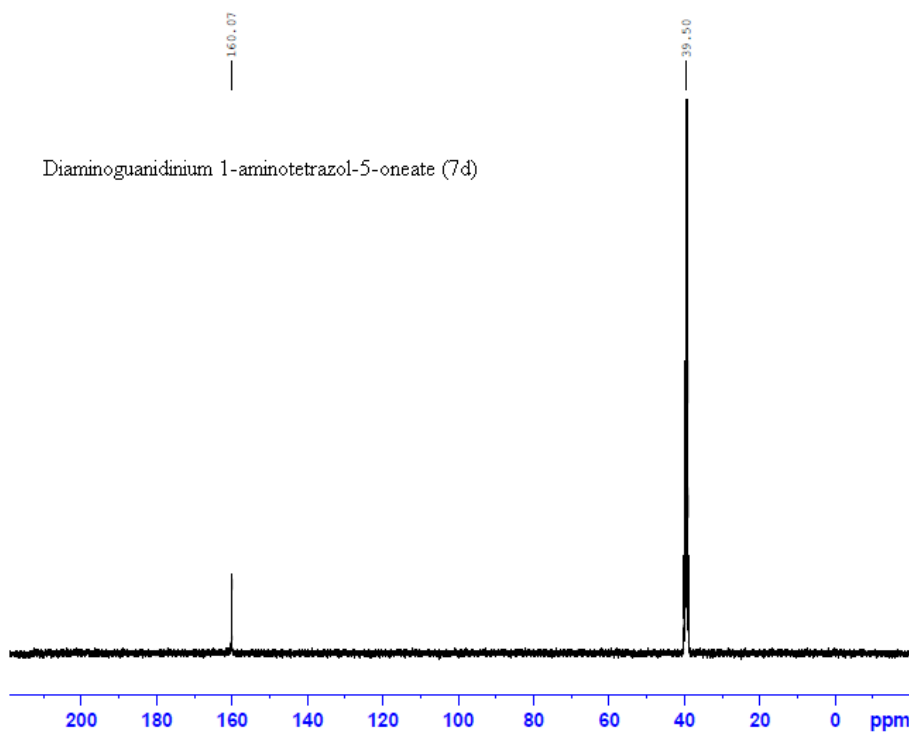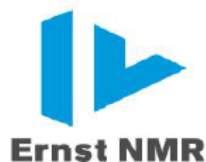

北京厄恩斯特检测技术有限公司  
 华北、华东、华南基地欢迎您  
 NMR、MS、LC、GC、IR、EA、ICP  
 PSA、SFT、XRF、STA、TEM、XPS  
<http://www.ernstnmr.com/>  
 010-62750911

```

NAME          YK0729-2
EXPNO         2
PROCNO        1
Date_         20140729
Time_         0.03
INSTRUM       spect
PROBHD        5 mm PABBO BB-
PULPROG       zgpg30
TD            65536
SOLVENT       DMSO
NS            1024
DS            4
SWH           24038.461 Hz
FIDRES        0.366798 Hz
AQ            1.3631988 sec
RG            2050
DW            20.800 usec
DE            6.50 usec
TE            298.6 K
D1            2.00000000 sec
D11           0.03000000 sec
TD0           1

===== CHANNEL f1 =====
NUC1          13C
P1            8.70 usec
PL1           -2.00 dB
PL1W          53.34635925 W
SFO1          100.6278593 MHz

===== CHANNEL f2 =====
CPDPRG2      waltz16
NUC2          1H
PCPD2        80.00 usec
PL2           0.00 dB
PL12          15.00 dB
  
```

Figure S5.  $^{13}\text{C}$  NMR of 7d

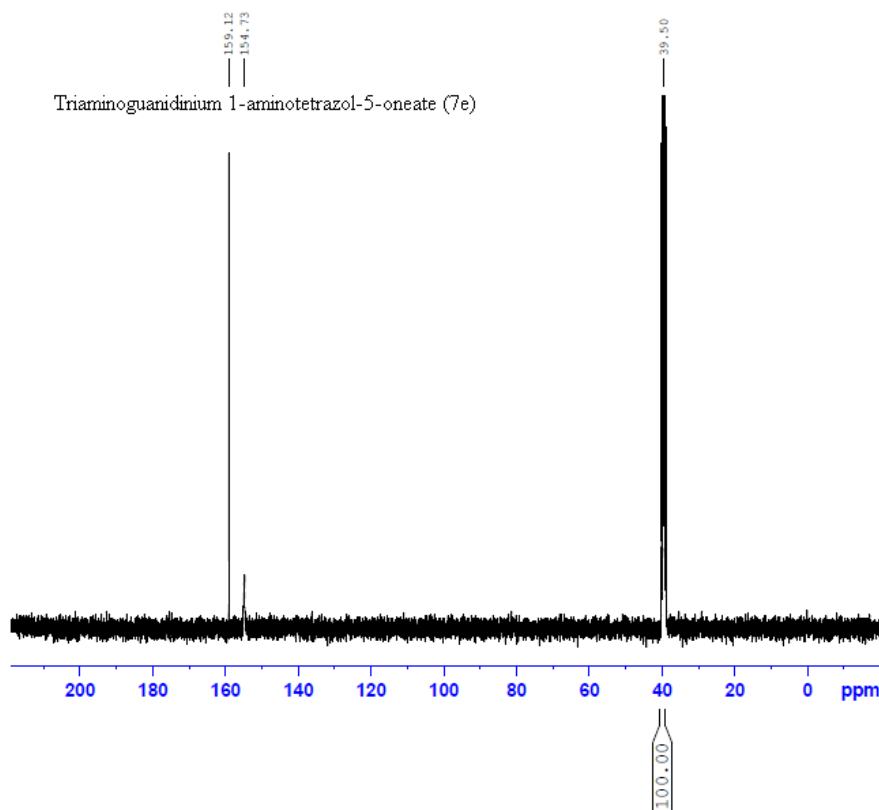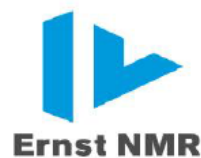

北京厄恩斯特检测技术有限公司  
 华北、华东、华南基地欢迎您  
 NMR、MS、LC、GC、IR、EA、ICP  
 PSA、SFT、XRF、STA、TEM、XPS  
<http://www.ernstnmr.com/>  
 010-62750911

```

NAME          YK0709-14
EXPNO         2
PROCNO        1
Date_         20140516
Time_         19.38
INSTRUM       spect
PROBHD        5 mm PABBO BB-
PULPROG       zgpg30
TD            65536
SOLVENT       DMSO
NS            1024
DS            4
SWH           24038.461 Hz
FIDRES        0.366798 Hz
AQ            1.3631988 sec
RG            2050
DW            20.800 usec
DE            6.50 usec
TE            298.6 K
D1            2.00000000 sec
D11           0.03000000 sec
TD0           1

===== CHANNEL f1 =====
NUC1          13C
P1            8.70 usec
PL1           -2.00 dB
PL1W          53.34635925 W
SFO1          100.6278593 MHz

===== CHANNEL f2 =====
CPDPRG2      waltz16
NUC2          1H
PCPD2        80.00 usec
PL2           0.00 dB
PL12          15.00 dB
  
```

Figure S6.  $^{13}\text{C}$  NMR of 7e

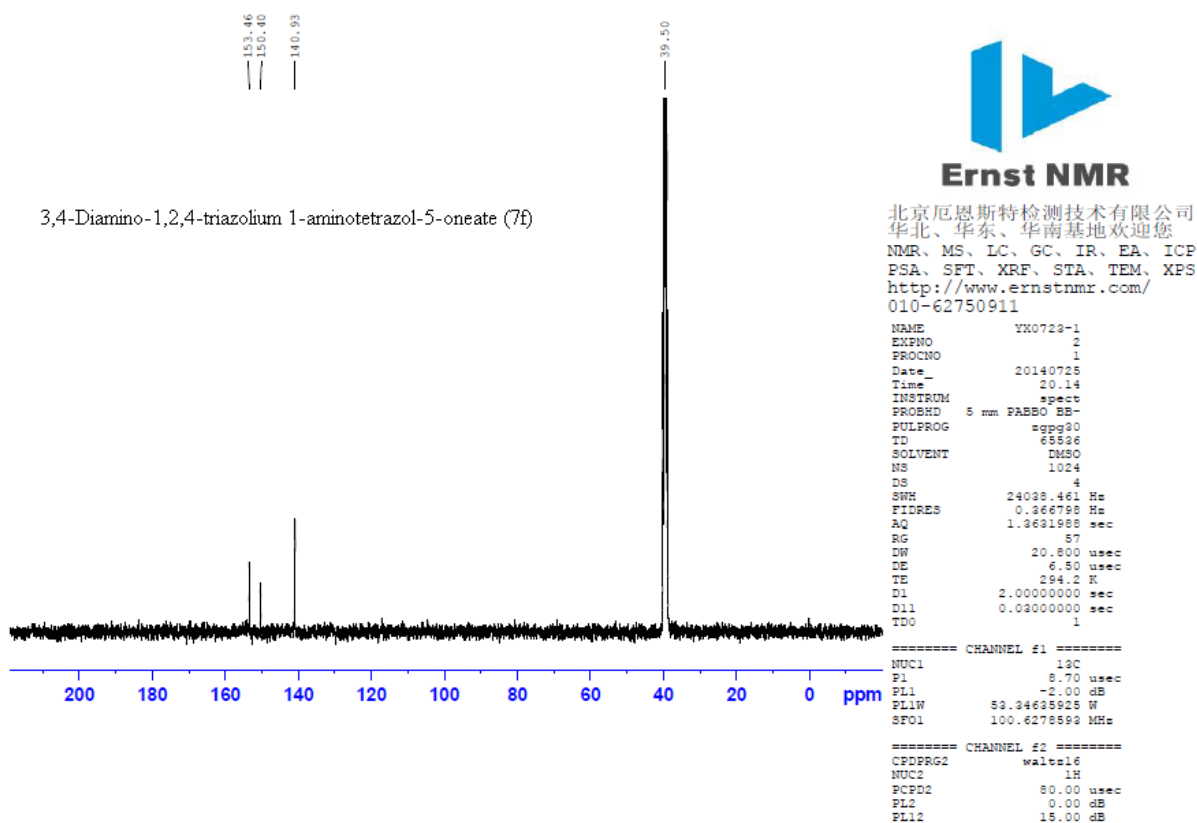

Figure S7.  $^{13}\text{C}$  NMR of 7f

MS

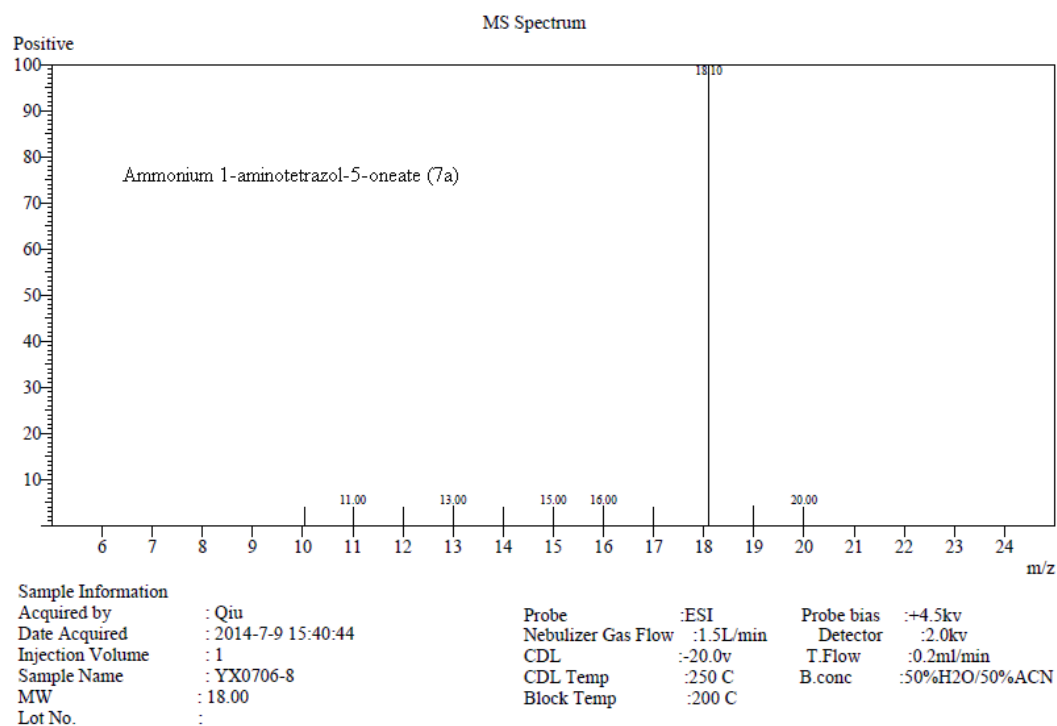

Figure S8. MS(ESI<sup>+</sup>) of 7a

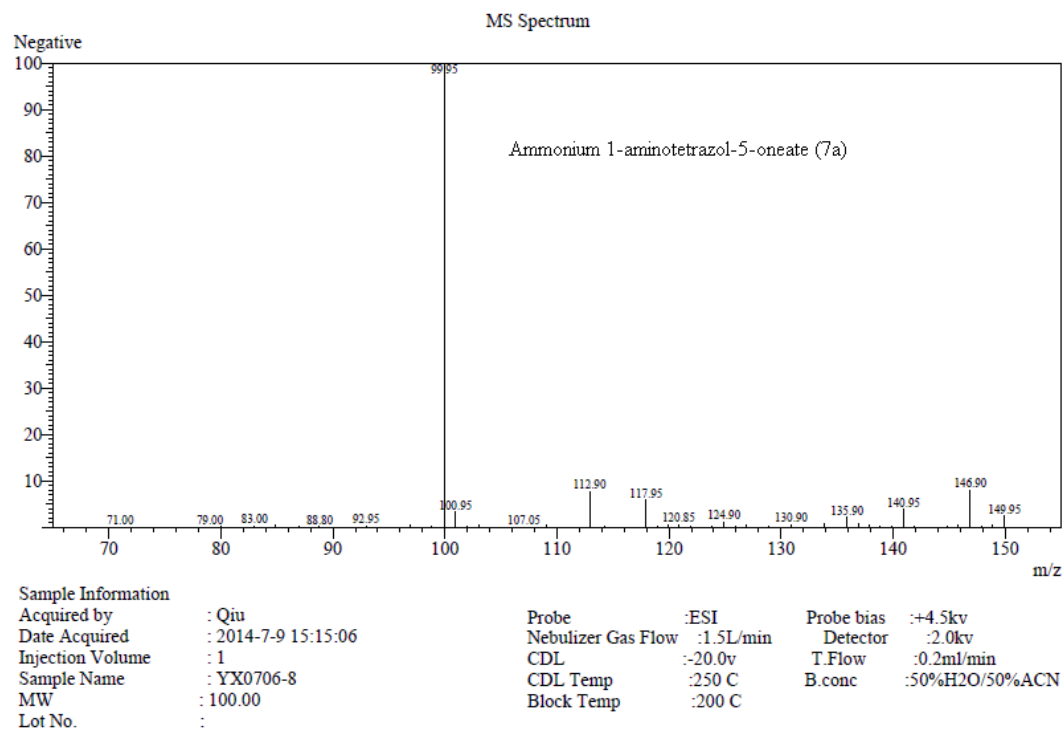

Figure S9. MS(ESI<sup>+</sup>) of 7a

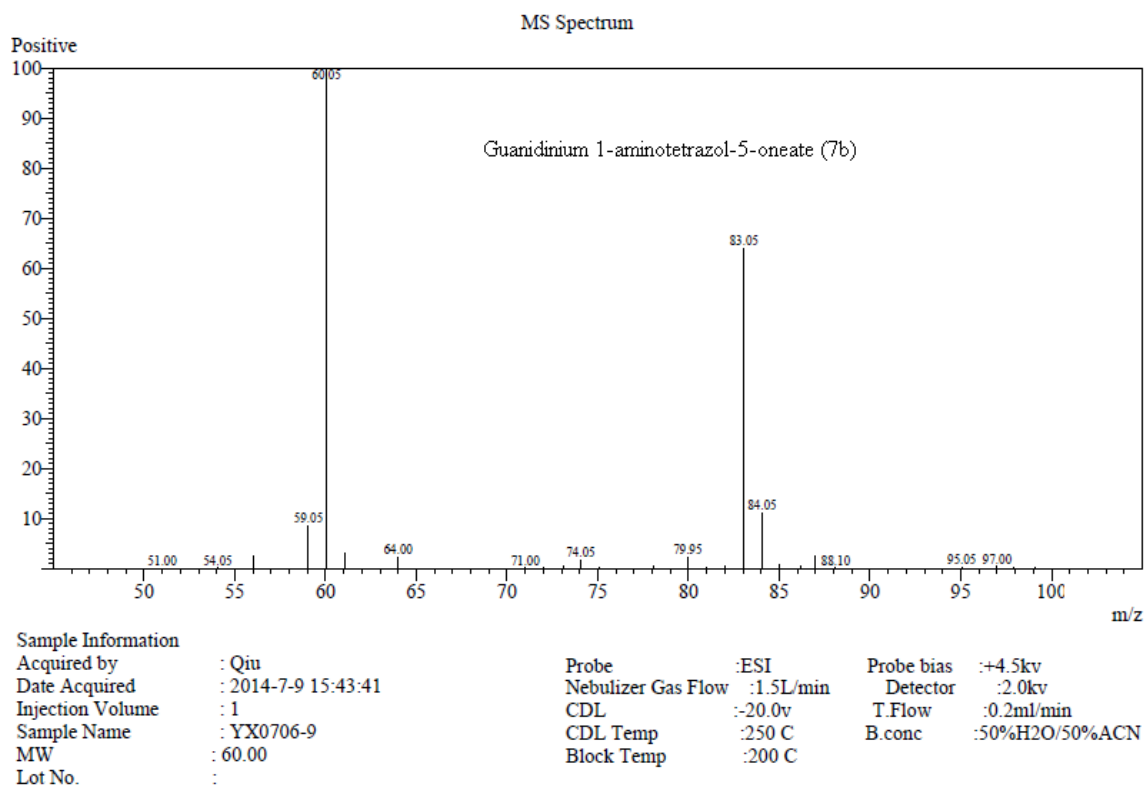

Figure S10. MS(ESI<sup>+</sup>) of 7b

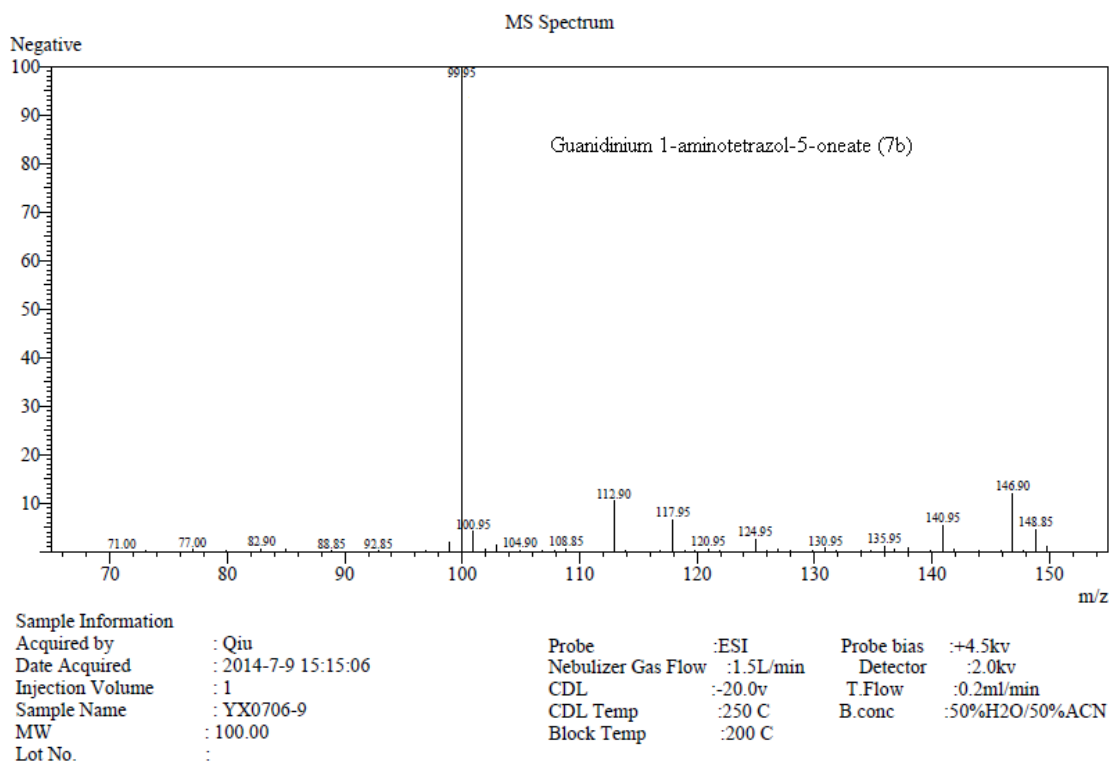

**Figure S11.** MS(ESI<sup>-</sup>) of 7b

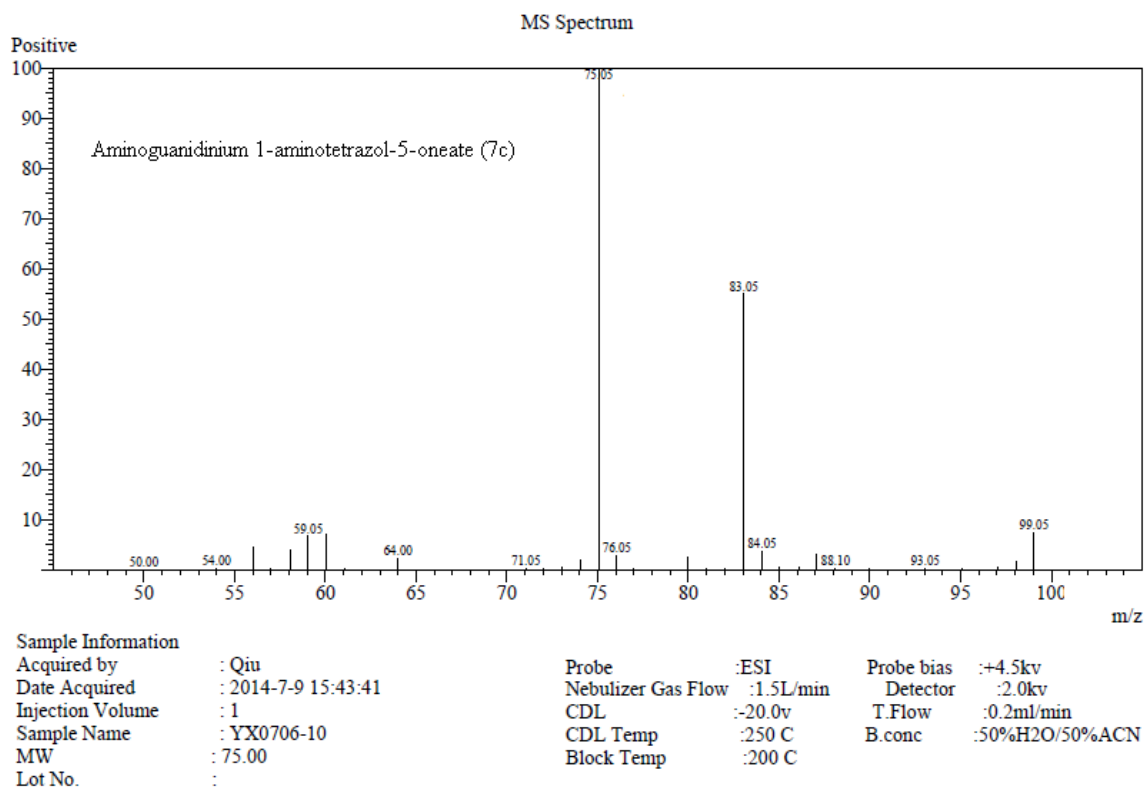

**Figure S12.** MS(ESI<sup>+</sup>) of 7c

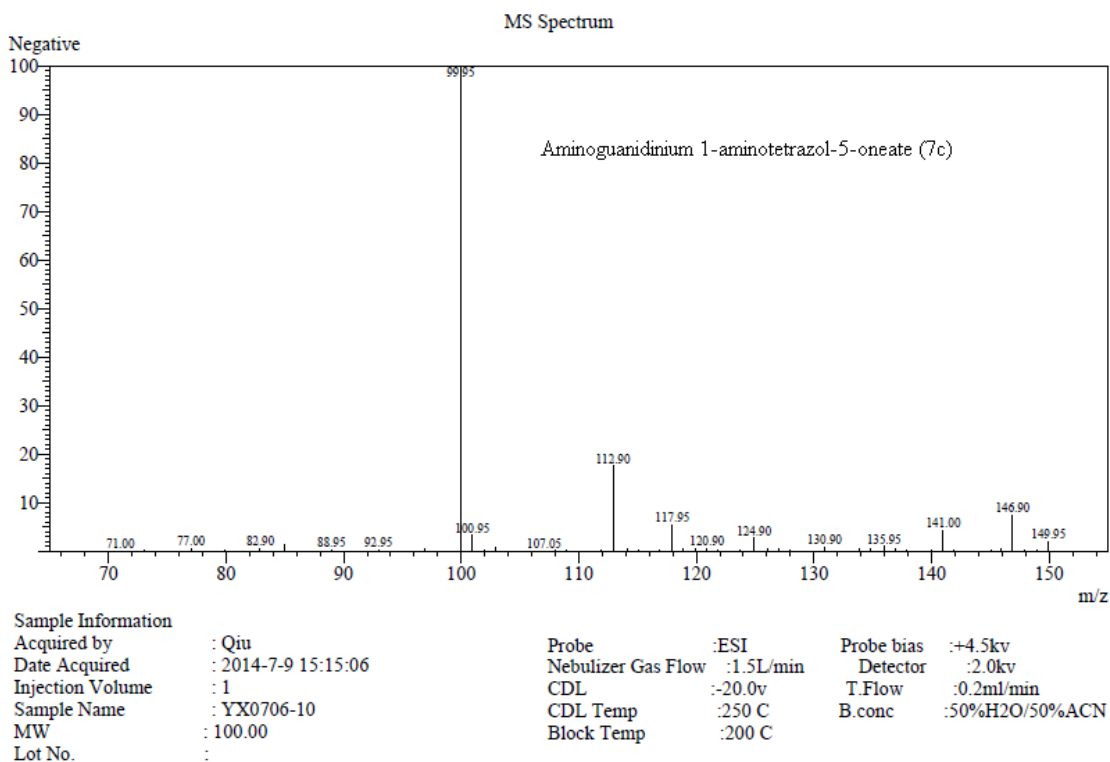

Figure S13. MS(ESI<sup>-</sup>) of 7c

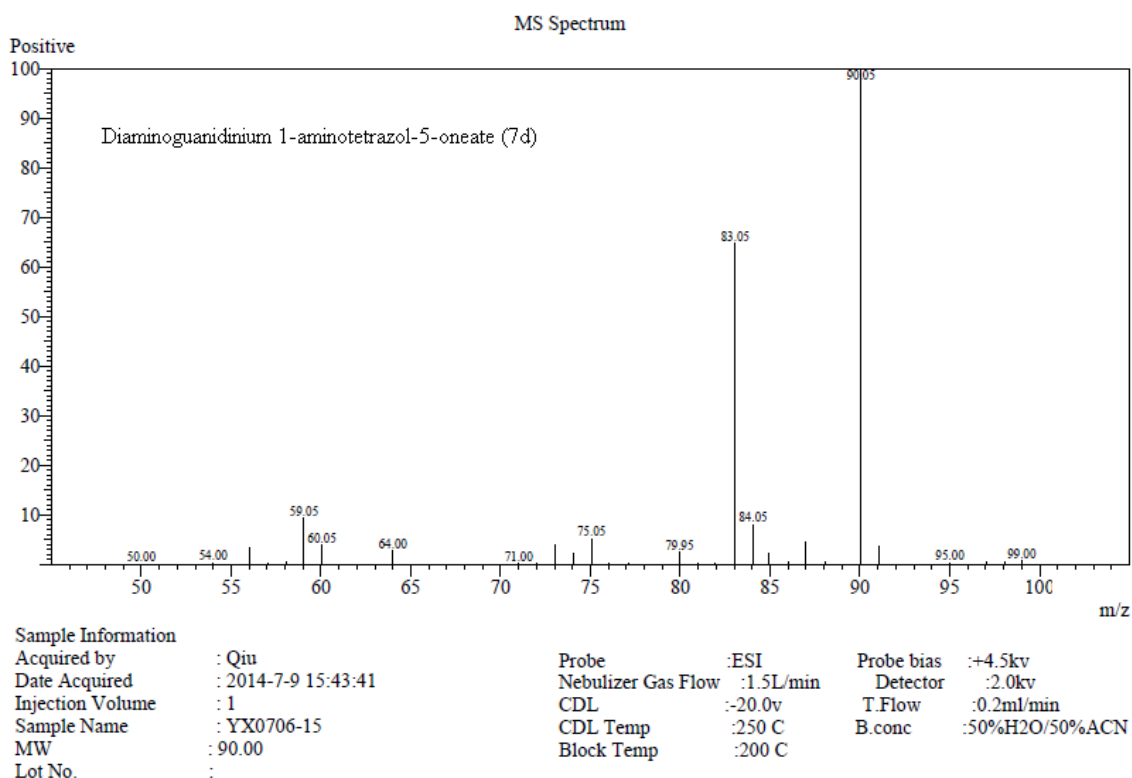

Figure S14. MS(ESI<sup>+</sup>) of 7d



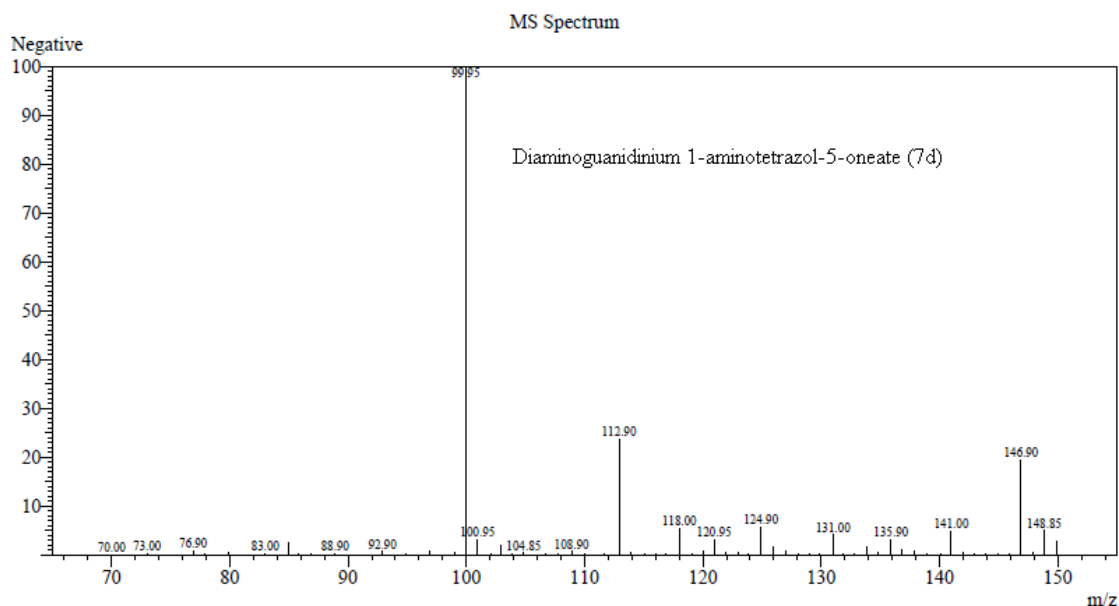

Sample Information

|                  |                     |                    |            |            |                 |
|------------------|---------------------|--------------------|------------|------------|-----------------|
| Acquired by      | : Qiu               | Probe              | : ESI      | Probe bias | : +4.5kv        |
| Date Acquired    | : 2014-7-9 15:15:06 | Nebulizer Gas Flow | : 1.5L/min | Detector   | : 2.0kv         |
| Injection Volume | : 1                 | CDL                | : -20.0v   | T.Flow     | : 0.2ml/min     |
| Sample Name      | : YX0706-15         | CDL Temp           | : 250 C    | B.conc     | : 50%H2O/50%ACN |
| MW               | : 100.00            | Block Temp         | : 200 C    |            |                 |
| Lot No.          | :                   |                    |            |            |                 |

**Figure S15.** MS(ESI<sup>-</sup>) of 7d

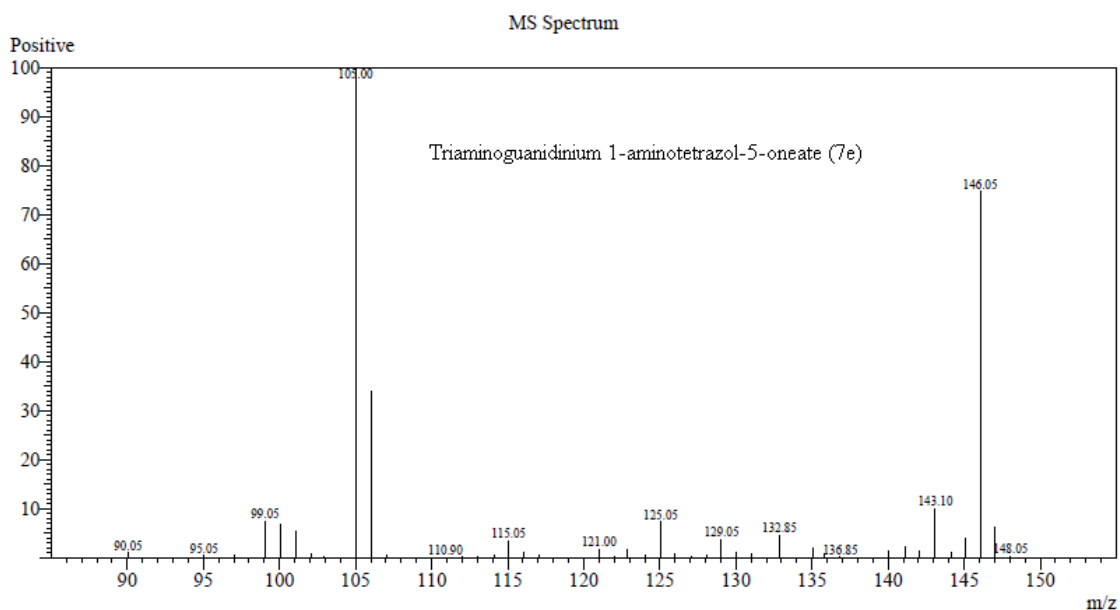

Sample Information

|                  |                     |                    |            |            |                 |
|------------------|---------------------|--------------------|------------|------------|-----------------|
| Acquired by      | : Qiu               | Probe              | : ESI      | Probe bias | : +4.5kv        |
| Date Acquired    | : 2014-7-9 15:48:53 | Nebulizer Gas Flow | : 1.5L/min | Detector   | : 2.0kv         |
| Injection Volume | : 1                 | CDL                | : -20.0v   | T.Flow     | : 0.2ml/min     |
| Sample Name      | : YX0706-14         | CDL Temp           | : 250 C    | B.conc     | : 50%H2O/50%ACN |
| MW               | : 105.00            | Block Temp         | : 200 C    |            |                 |
| Lot No.          | :                   |                    |            |            |                 |

**Figure S16.** MS(ESI<sup>+</sup>) of 7e

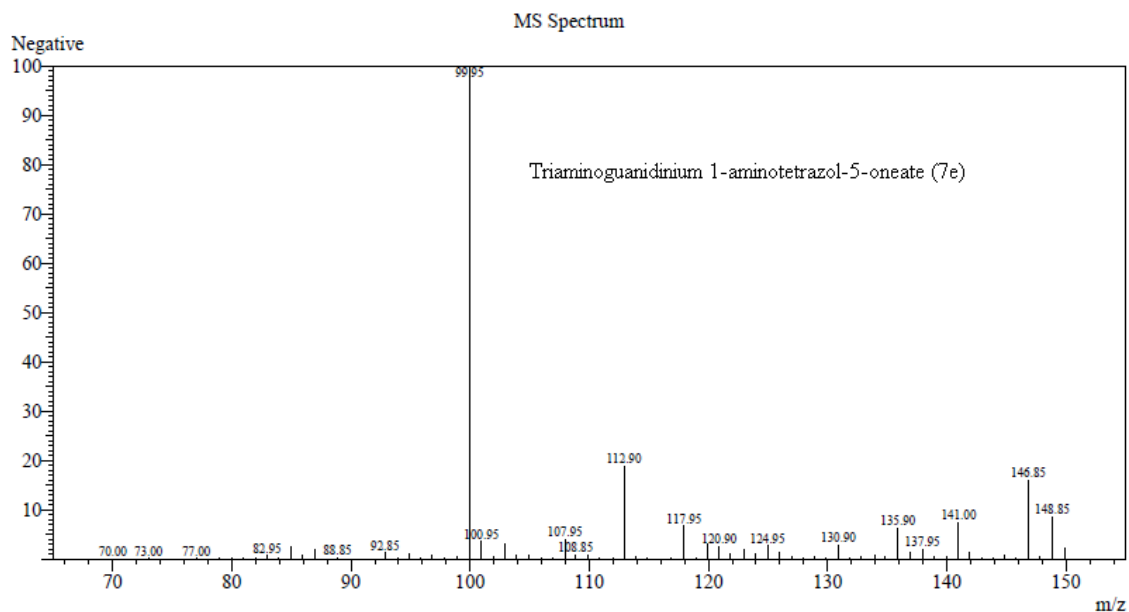

|                    |                     |                    |                 |
|--------------------|---------------------|--------------------|-----------------|
| Sample Information |                     |                    |                 |
| Acquired by        | : Qiu               | Probe              | : ESI           |
| Date Acquired      | : 2014-7-9 15:15:06 | Probe bias         | : +4.5kv        |
| Injection Volume   | : 1                 | Nebulizer Gas Flow | : 1.5L/min      |
| Sample Name        | : YX0706-14         | Detector           | : 2.0kv         |
| MW                 | : 100.00            | CDL                | : -20.0v        |
| Lot No.            | :                   | T.Flow             | : 0.2ml/min     |
|                    |                     | CDL Temp           | : 250 C         |
|                    |                     | Block Temp         | : 200 C         |
|                    |                     | B.conc             | : 50%H2O/50%ACN |

**Figure S17.** MS(ESI<sup>-</sup>) of 7e

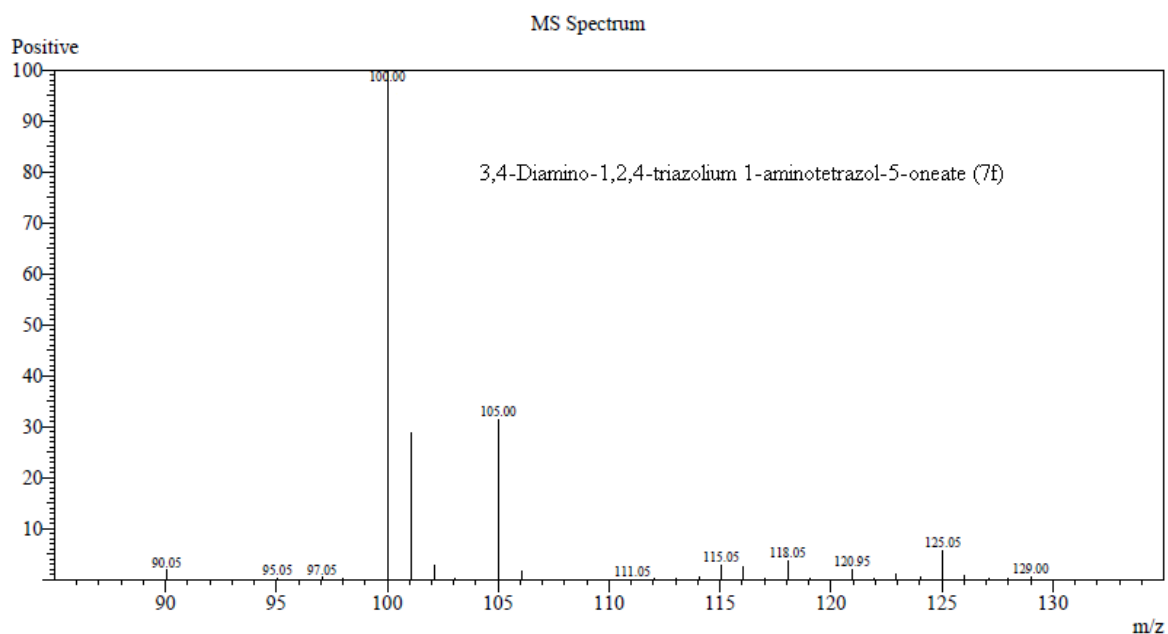

|                    |                     |                    |                 |
|--------------------|---------------------|--------------------|-----------------|
| Sample Information |                     |                    |                 |
| Acquired by        | : Qiu               | Probe              | : ESI           |
| Date Acquired      | : 2014-7-9 15:52:34 | Probe bias         | : +4.5kv        |
| Injection Volume   | : 1                 | Nebulizer Gas Flow | : 1.5L/min      |
| Sample Name        | : WJT0704-2         | Detector           | : 2.0kv         |
| MW                 | : 100.00            | CDL                | : -20.0v        |
| Lot No.            | :                   | T.Flow             | : 0.2ml/min     |
|                    |                     | CDL Temp           | : 250 C         |
|                    |                     | Block Temp         | : 200 C         |
|                    |                     | B.conc             | : 50%H2O/50%ACN |

**Figure S18.** MS(ESI<sup>+</sup>) of 7f

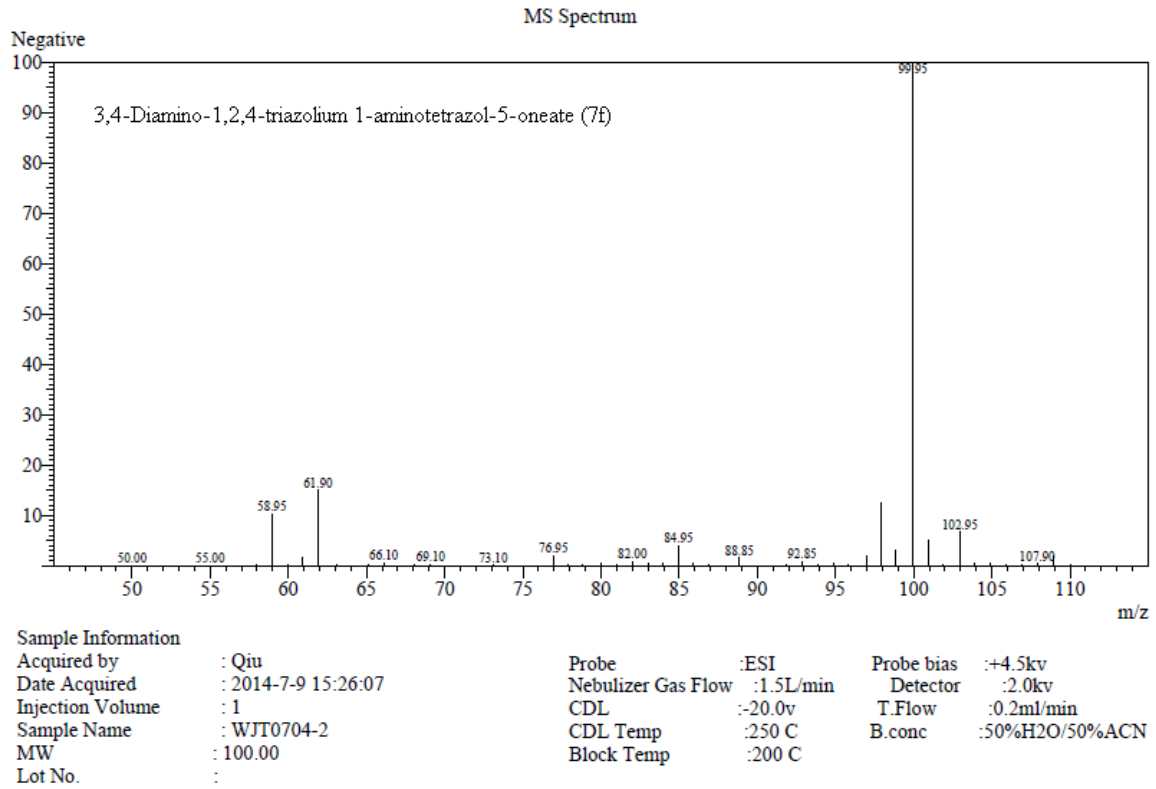

Figure S19. MS(ESI) of 7f

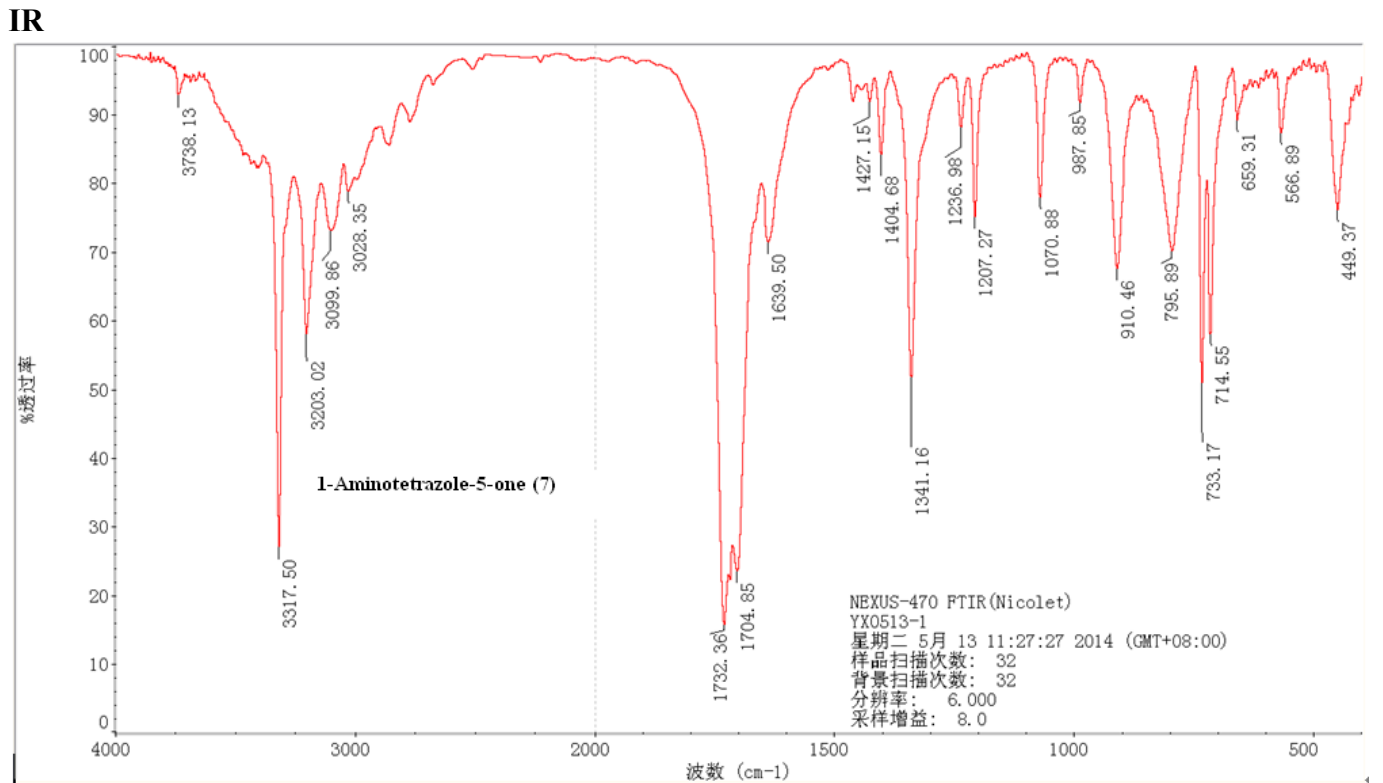

Figure S20. IR of 7

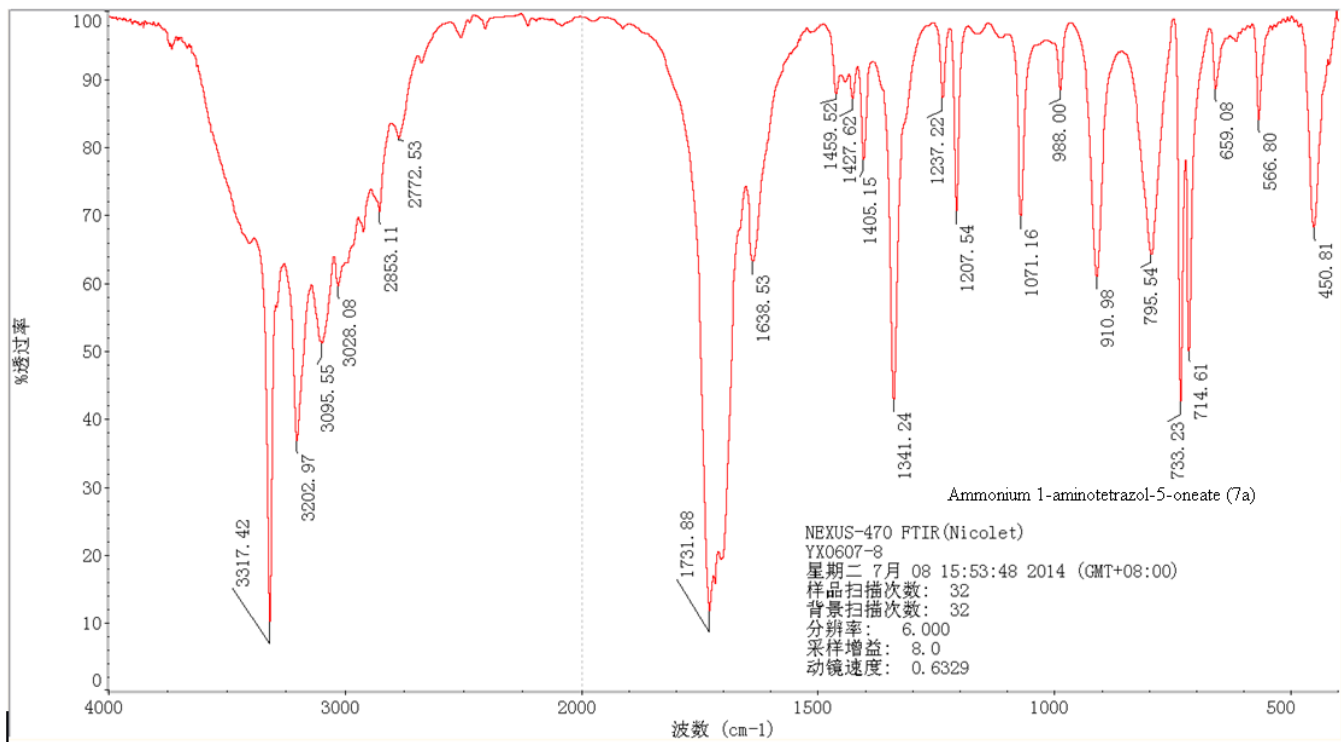

Figure S21. IR of 7a

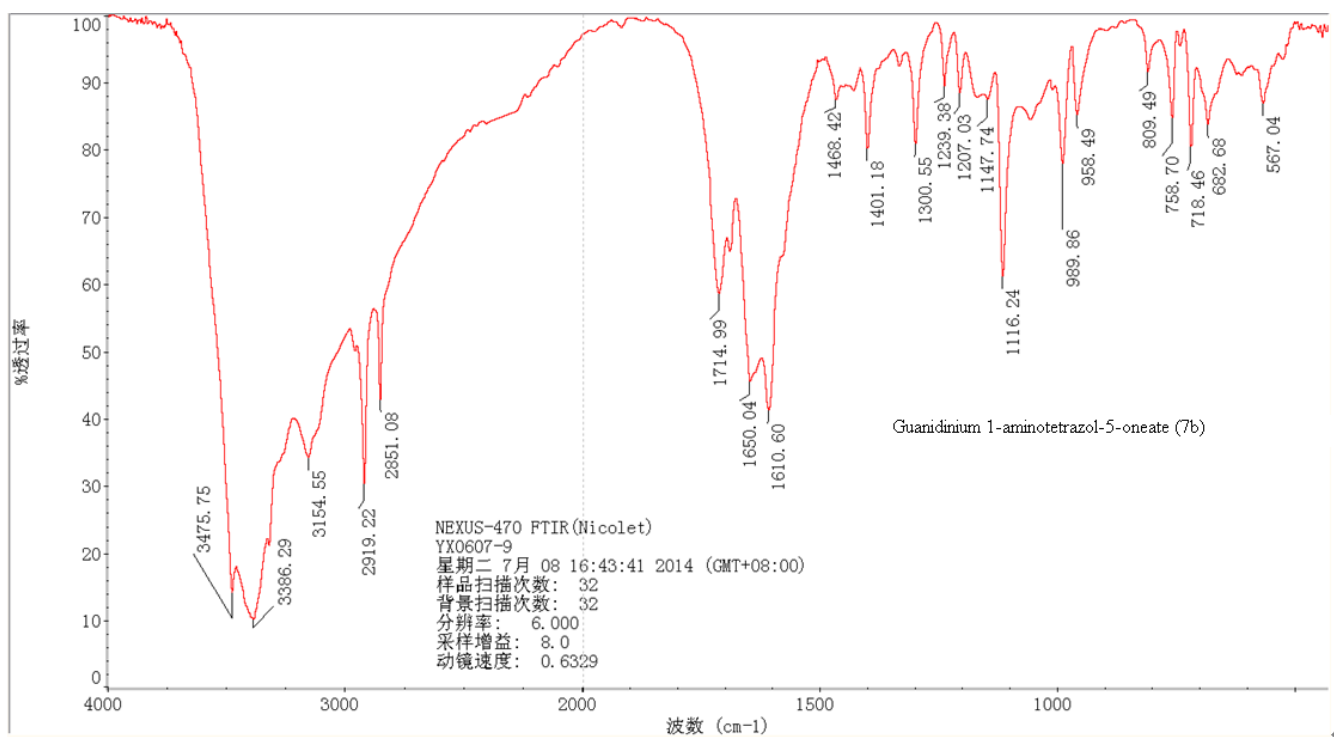

Figure S22. IR of 7b

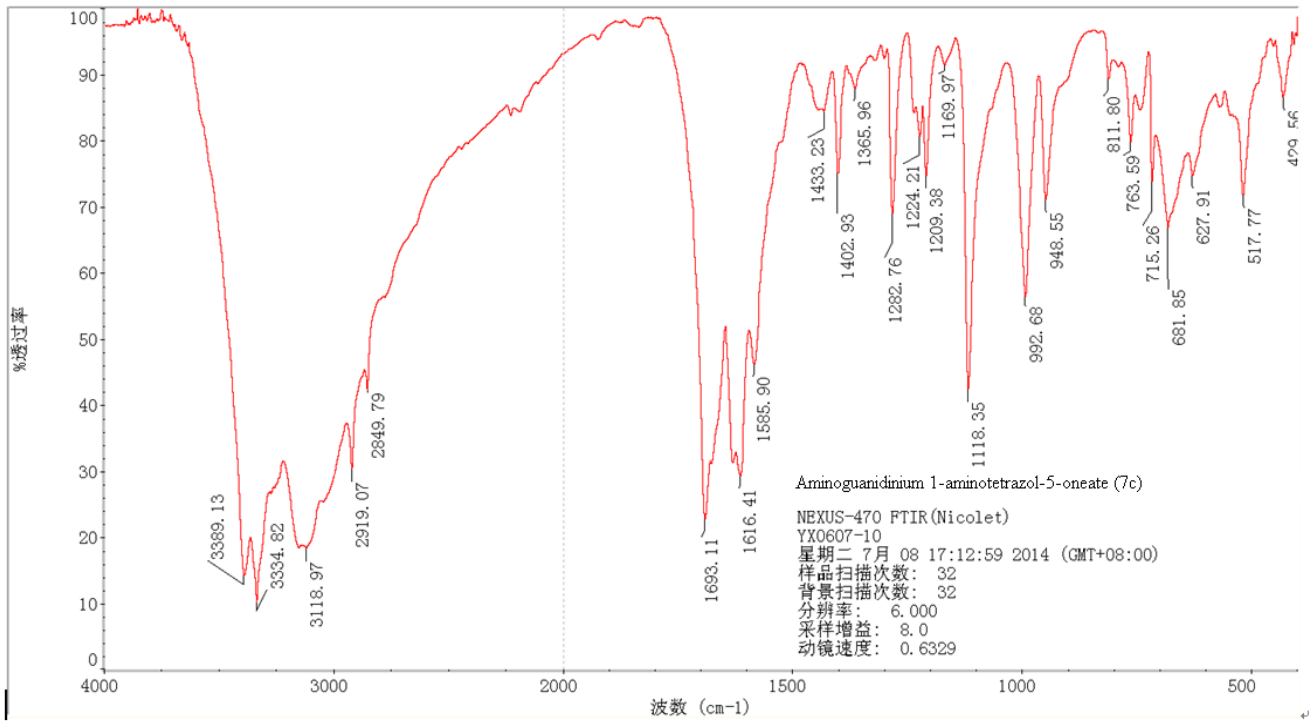

Figure S23. IR of 7c

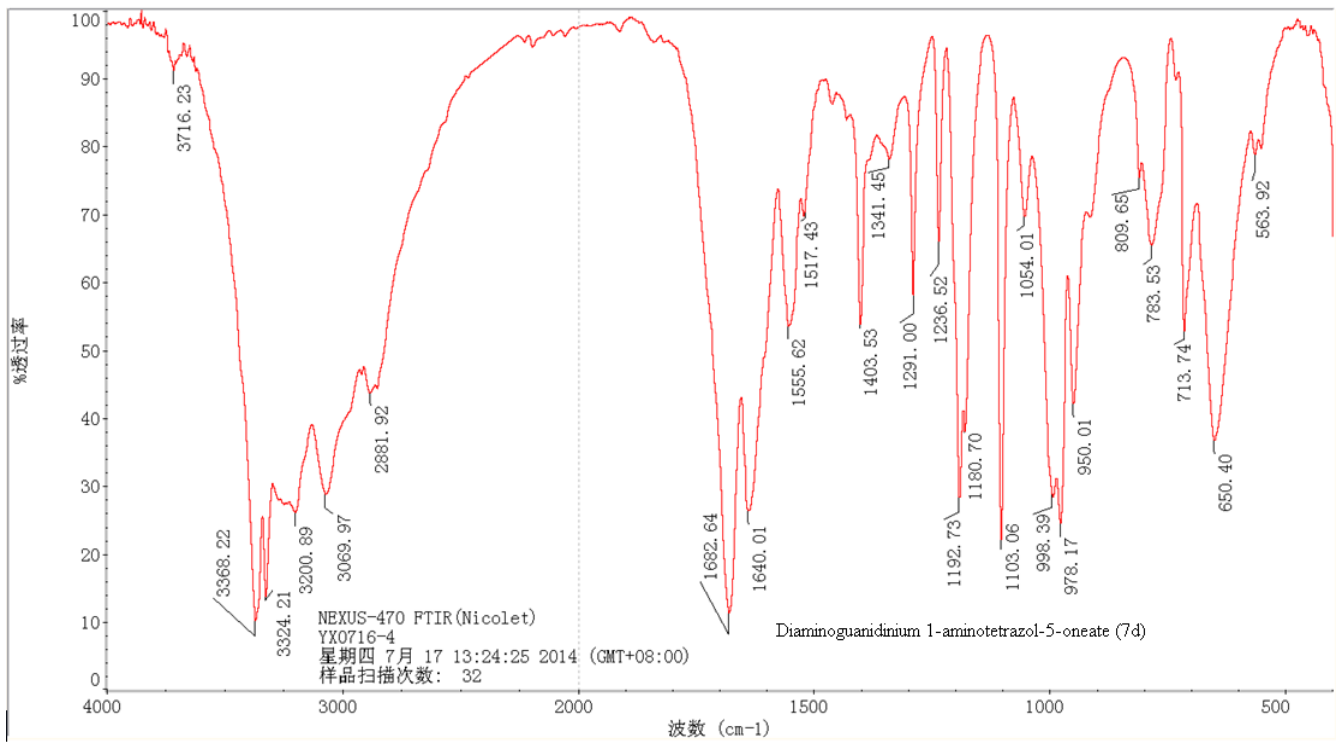

Figure S24. IR of 7d

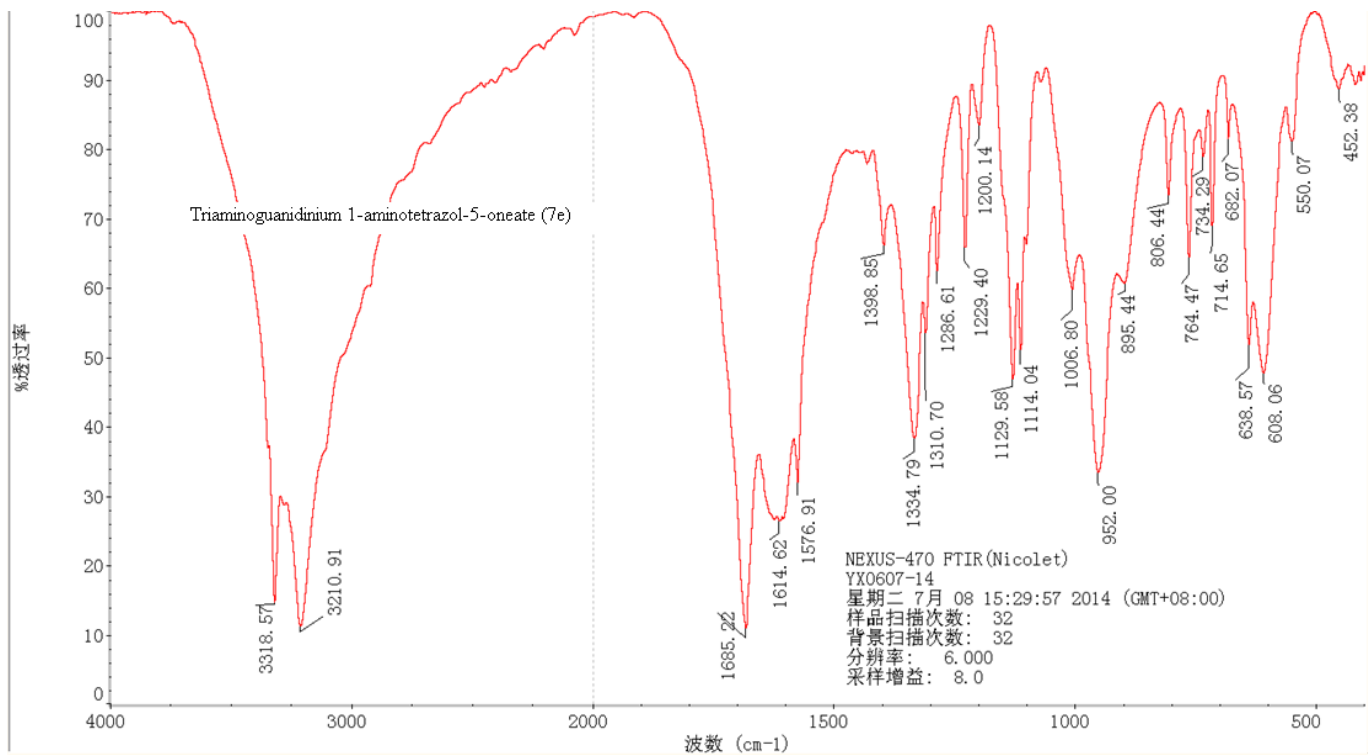

Figure S25. IR of 7e

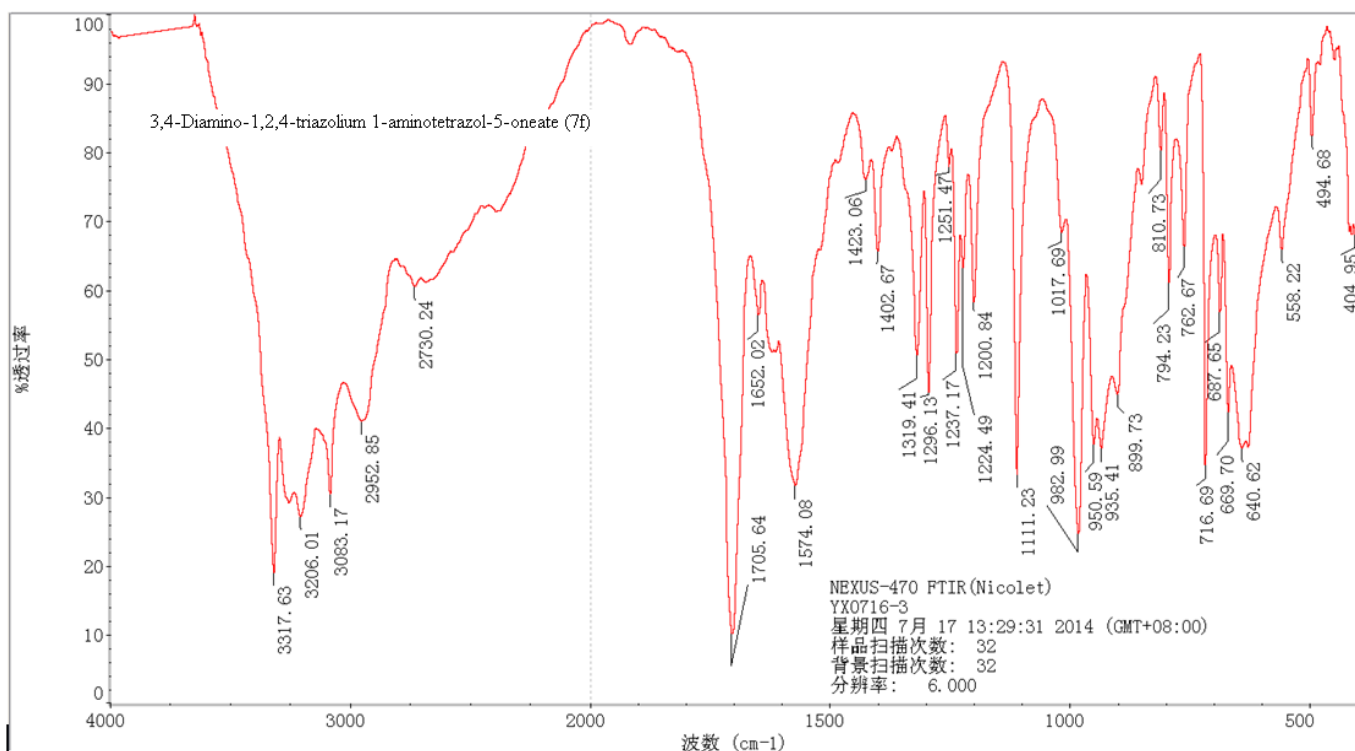

Figure S26. IR of 7f

## Crystallographic data

**Table S1.** Crystallographic data for 1-amino-tetrazol-5-one and its salts

|                                            | 7                                | 7a                               | 7b                                             | 7c                                             | 7d                                               | 7e                                               | 7f                                              |
|--------------------------------------------|----------------------------------|----------------------------------|------------------------------------------------|------------------------------------------------|--------------------------------------------------|--------------------------------------------------|-------------------------------------------------|
| Formula                                    | CH <sub>3</sub> N <sub>5</sub> O | CH <sub>6</sub> N <sub>6</sub> O | C <sub>2</sub> H <sub>8</sub> N <sub>8</sub> O | C <sub>2</sub> H <sub>9</sub> N <sub>9</sub> O | C <sub>2</sub> H <sub>10</sub> N <sub>10</sub> O | C <sub>2</sub> H <sub>11</sub> N <sub>11</sub> O | C <sub>3</sub> H <sub>8</sub> N <sub>10</sub> O |
| FW /g·mol <sup>-1</sup>                    | 101.08                           | 118.12                           | 160.16                                         | 175.18                                         | 190.20                                           | 205.22                                           | 200.19                                          |
| Crystal system                             | orthorhombic                     | monoclinic                       | monoclinic                                     | monoclinic                                     | monoclinic                                       | orthorhombic                                     | triclinic                                       |
| Space group                                | Pbca                             | P2(1)/c                          | C2/c                                           | P2(1)/n                                        | P2(1)/n                                          | Pbca                                             | P-1                                             |
| Color/habit                                | white/block                      | white/block                      | white/block                                    | yellow/block                                   | yellow/block                                     | yellow/block                                     | white/block                                     |
| Size/mm                                    | 0.37×0.35×<br>0.16               | 0.36×0.15×<br>0.12               | 0.43×0.42×<br>0.32                             | 0.34×0.22×<br>0.17                             | 0.21×0.13×<br>0.06                               | 0.20×0.20×<br>0.20                               | 0.15×0.12×<br>0.07                              |
| <i>a</i> /Å                                | 9.8873(7)                        | 10.6535(7)                       | 12.7785(11)                                    | 8.5361(4)                                      | 7.0441(5)                                        | 12.8237(6)                                       | 6.0700(6)                                       |
| <i>b</i> /Å                                | 5.5314(3)                        | 6.5711(5)                        | 6.4100(6)                                      | 6.5988(3)                                      | 12.0324(11)                                      | 6.7049(3)                                        | 7.1682(7)                                       |
| <i>c</i> /Å                                | 13.6734(9)                       | 6.9431(6)                        | 16.5787(15)                                    | 13.2935(7)                                     | 10.1093(8)                                       | 20.2018(10)                                      | 10.6018(9)                                      |
| <i>α</i> /°                                | 90.00                            | 90.00                            | 90.00                                          | 90.00                                          | 90.00                                            | 90.00                                            | 76.8520(10)                                     |
| <i>β</i> /°                                | 90.00                            | 101.531(2)                       | 93.3030(10)                                    | 103.3740(10)                                   | 105.964(2)                                       | 90.00                                            | 88.343(2)                                       |
| <i>γ</i> /°                                | 90.00                            | 90.00                            | 90.00                                          | 90.00                                          | 90.00                                            | 90.00                                            | 65.4060(10)                                     |
| <i>V</i> /Å <sup>3</sup>                   | 747.81(8)                        | 476.24(6)                        | 1355.7(2)                                      | 728.49(6)                                      | 823.79(12)                                       | 1736.98(14)                                      | 407.32(7)                                       |
| <i>Z</i>                                   | 8                                | 4                                | 8                                              | 4                                              | 4                                                | 8                                                | 2                                               |
| $\rho_{\text{calcd.}}$ /g·cm <sup>-3</sup> | 1.796                            | 1.647                            | 1.569                                          | 1.597                                          | 1.534                                            | 1.569                                            | 1.632                                           |
| $\mu$ /mm <sup>-1</sup>                    | 0.154                            | 0.139                            | 0.128                                          | 0.130                                          | 0.125                                            | 0.128                                            | 0.132                                           |
| <i>F</i> (000)                             | 416                              | 248                              | 672                                            | 368                                            | 400                                              | 864                                              | 208                                             |
| <i>T</i> /K                                | 298                              | 298                              | 298                                            | 296                                            | 298                                              | 296                                              | 298                                             |
| $\theta$ Min-max /°                        | 2.98, 28.61                      | 3.672, 23.065                    | 2.461, 27.731                                  | 2.59, 28.68                                    | 2.69, 25.00                                      | 2.02, 28.57                                      | 3.22, 25.01                                     |
| Dataset h; k; l                            | -11:13; -7:7; -<br>14:18         | -12:12; -7:7; -<br>8:8           | -15:13; -7:5; -<br>19:19                       | -11:10; -6:8; -<br>17:17                       | -8:8; -10:14; -<br>12:10                         | -17:15; -6:8; -<br>26:26                         | -7:5; -8:8; -<br>12:11                          |
| Reflections collected                      | 4355                             | 838                              | 3139                                           | 5898                                           | 4077                                             | 13549                                            | 2105                                            |
| Independent refl.                          | 954                              | 838                              | 1201                                           | 1862                                           | 1452                                             | 2195                                             | 1427                                            |
| <i>R</i> <sub>int</sub>                    | 0.0557                           | 0.0000                           | 0.0329                                         | 0.0162                                         | 0.0758                                           | 0.0362                                           | 0.0513                                          |
| Parameters                                 | 64                               | 74                               | 100                                            | 129                                            | 118                                              | 171                                              | 127                                             |
| <i>R</i> <sub>1</sub> (obs)                | 0.0761                           | 0.0965                           | 0.0602                                         | 0.0445                                         | 0.0836                                           | 0.0533                                           | 0.1121                                          |
| w <i>R</i> <sub>2</sub> (all data)         | 0.1140                           | 0.2048                           | 0.1169                                         | 0.1092                                         | 0.0908                                           | 0.0985                                           | 0.2065                                          |
| Resd. dens. /e·Å <sup>-3</sup>             | 0.233,<br>-0.218                 | 0.352, -0.376                    | 0.154, -0.213                                  | 0.205, -0.219                                  | 0.206, -0.230                                    | 0.164, -0.255                                    | 0.470, -0.450                                   |
| CCDC                                       | 1018898                          | 1018899                          | 1018904                                        | 1018893                                        | 1018919                                          | 1018921                                          | 1018905                                         |

## Packing diagram and Hydrogen bond for all energetic compounds

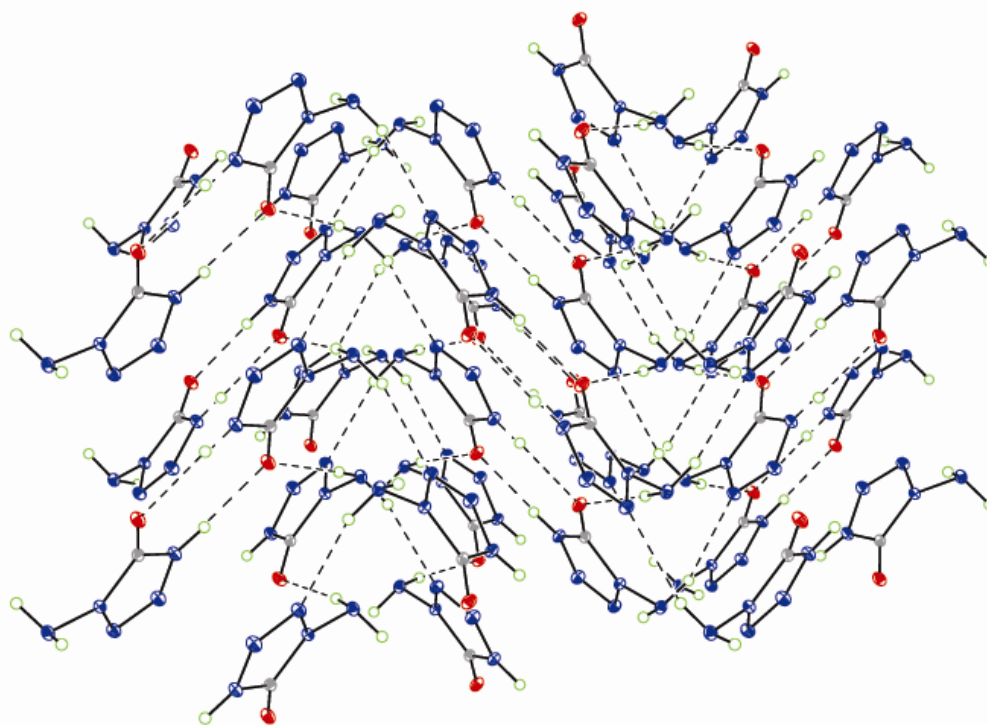

**Figure S27.** Packing diagram of 7 viewed down the a axis

**Table S2.** Hydrogen bond lengths(Å) and bond angles(°) of 7

| D-H...A     | d(D-H) | d(H...A) | d(D...A) | D-H...A |
|-------------|--------|----------|----------|---------|
| N4-H4...O1  | 0.8600 | 1.9600   | 2.807(2) | 167.00  |
| N5-H5B...N2 | 0.8900 | 2.3200   | 3.127(2) | 151.00  |
| N5-H5C...O1 | 0.8900 | 2.1200   | 2.993(2) | 167.00  |



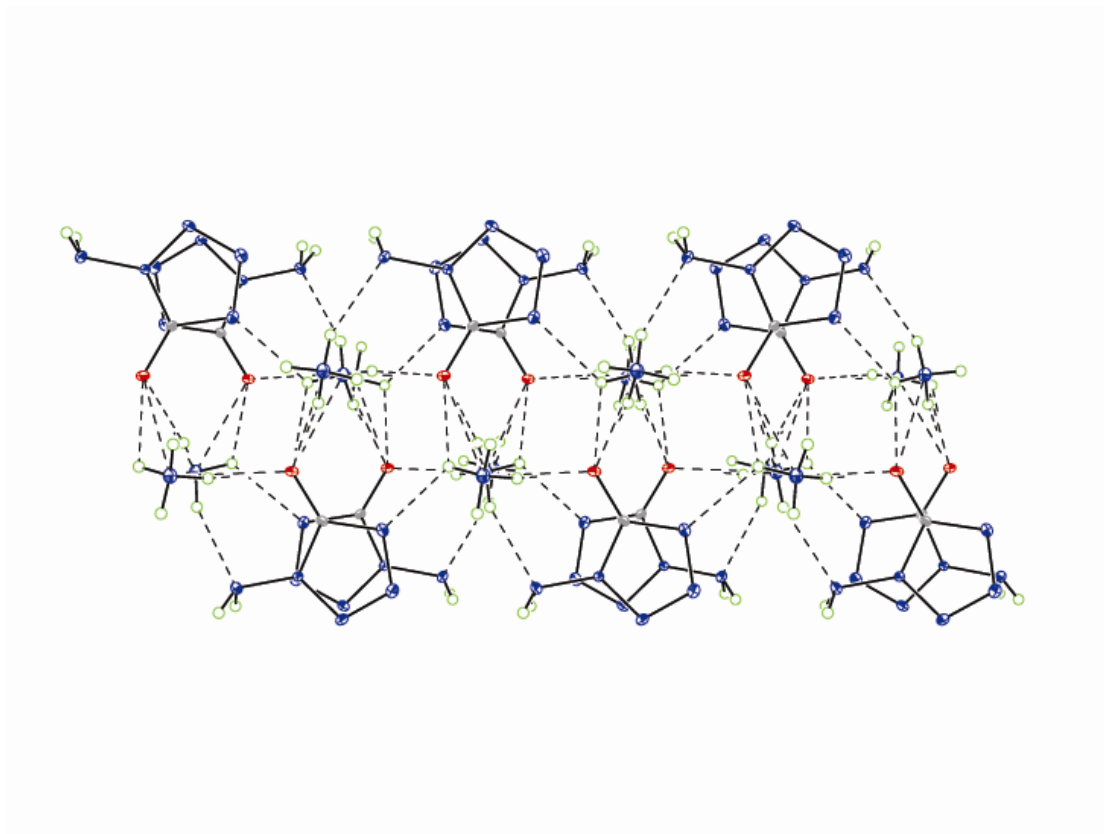

**Figure S28.** Packing diagram of **7a** viewed down the *c* axis

**Table S3.** Hydrogen bond lengths(Å) and bond angles(°) of **7a**

| D-H...A     | d(D-H) | d(H...A) | d(D...A) | D-H...A |
|-------------|--------|----------|----------|---------|
| N5-H5A...N2 | 0.8900 | 2.4300   | 3.1977   | 145.00  |
| N5-H5B...N2 | 0.8900 | 2.5300   | 3.3468   | 153.00  |
| N6-H6A...O1 | 0.9000 | 1.9600   | 2.8451   | 169.00  |
| N6-H6B...O1 | 0.9000 | 1.9400   | 2.8327   | 169.00  |
| N6-H6C...N5 | 0.9000 | 2.3000   | 3.1552   | 159.00  |
| N6-H6D...N4 | 0.9000 | 2.3500   | 3.0157   | 131.00  |
| N6-H6D...O1 | 0.9000 | 2.3900   | 2.9594   | 122.00  |

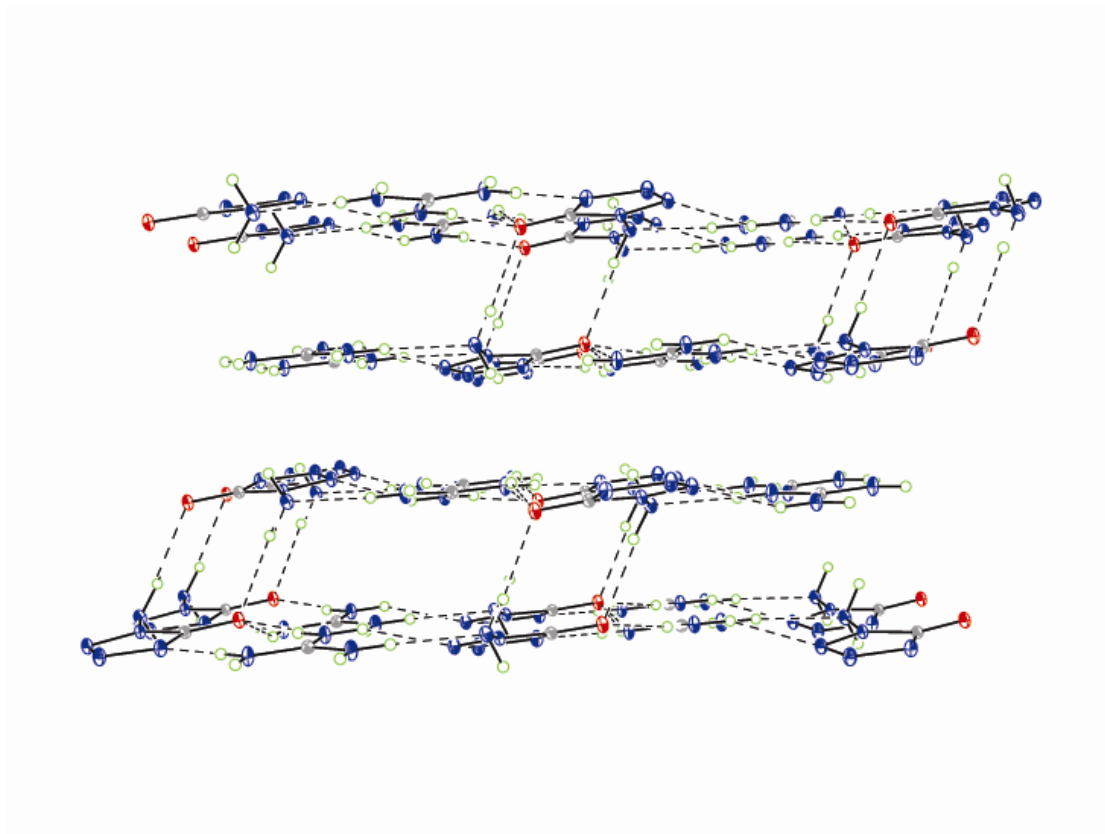

**Figure S29.** Packing diagram of **7b** viewed down the b axis

**Table S4.** Hydrogen bond lengths(Å) and bond angles(°) of **7b**

| D-H...A     | d(D-H) | d(H...A) | d(D...A) | D-H...A |
|-------------|--------|----------|----------|---------|
| N5-H5A...O1 | 0.8900 | 2.0500   | 2.9253   | 169.00  |
| N5-H5B...N6 | 0.8900 | 2.6200   | 3.4232   | 150.00  |
| N6-H6A...N5 | 0.8600 | 2.0400   | 2.8986   | 179.00  |
| N6-H6B...O1 | 0.8600 | 2.0700   | 2.8840   | 158.00  |
| N7-H7A...O1 | 0.8600 | 2.0400   | 2.9014   | 174.00  |
| N7-H7B...N2 | 0.8600 | 2.3000   | 3.1182   | 159.00  |
| N8-H8A...N5 | 0.8600 | 2.2600   | 3.1174   | 171.00  |

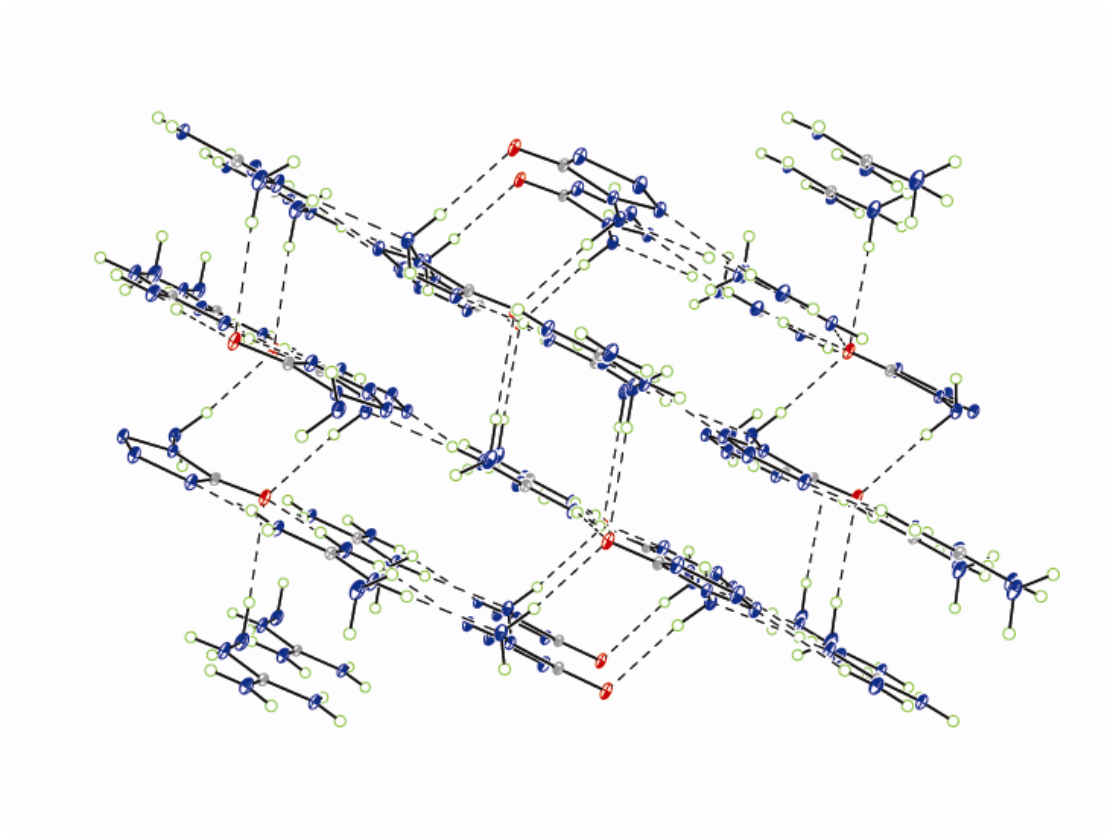

**Figure S30.** Packing diagram of **7c** viewed down the *b* axis

**Table S5.** Hydrogen bond lengths(Å) and bond angles(°) of **7c**

| D-H...A     | d(D-H) | d(H...A) | d(D...A) | D-H...A |
|-------------|--------|----------|----------|---------|
| N1-H1A...N6 | 0.8600 | 2.3600   | 2.6846   | 103.00  |
| N1-H1A...O1 | 0.8600 | 2.1900   | 3.0237   | 162.00  |
| N1-H1B...N5 | 0.8600 | 2.0800   | 2.9332   | 171.00  |
| N6-H2...O1  | 0.9000 | 2.4600   | 3.3130   | 158.00  |
| N4-H4...O1  | 0.9100 | 2.1100   | 2.9876   | 161.00  |
| N7-H7A...O1 | 0.8600 | 2.0500   | 2.9085   | 175.00  |
| N7-H7B...N3 | 0.8600 | 2.4100   | 3.2541   | 169.00  |
| N9-H10...N4 | 0.8300 | 2.1600   | 2.9810   | 168.00  |

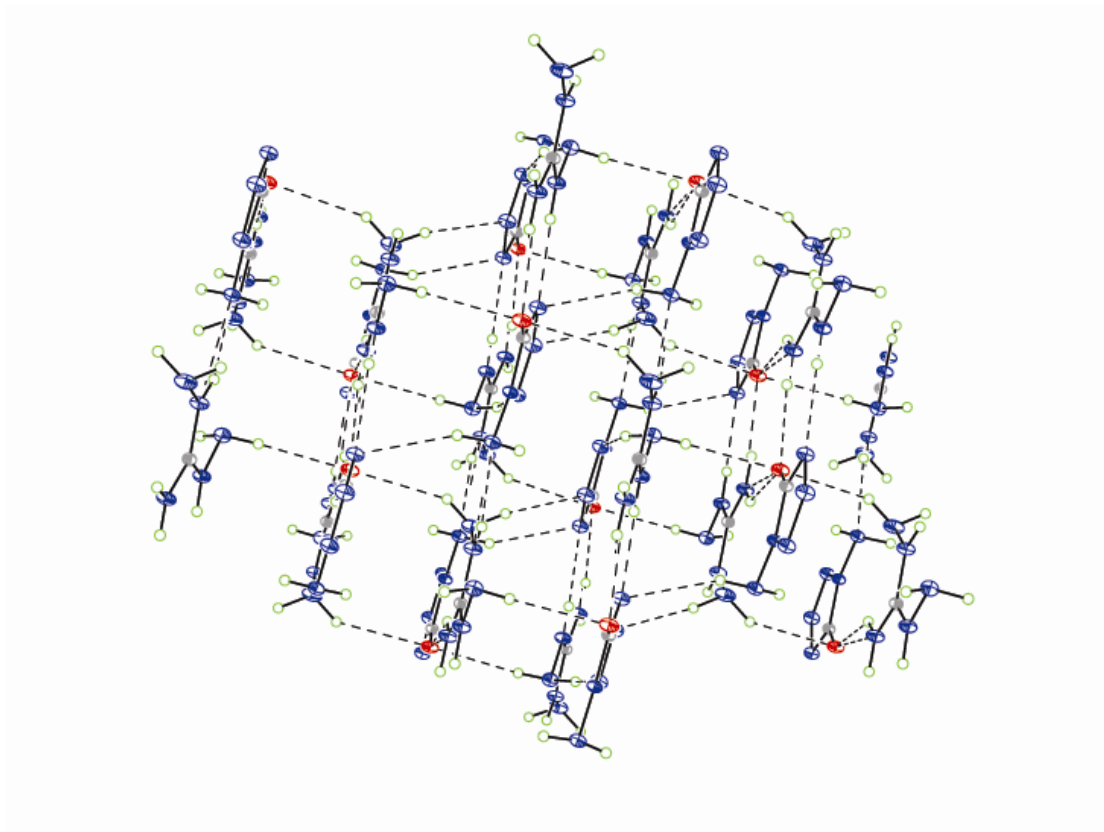

**Figure S31.** Packing diagram of **7d** viewed down the *b* axis

**Table S6.** Hydrogen bond lengths(Å) and bond angles(°) of **7d**

| D-H...A       | d(D-H) | d(H...A) | d(D...A) | D-H...A |
|---------------|--------|----------|----------|---------|
| N5-H5C...N4   | 0.8900 | 2.3300   | 3.1126   | 146.00  |
| N6-H6A...N7   | 0.8600 | 2.3700   | 2.6982   | 103.00  |
| N6-H6A...O1   | 0.8600 | 2.2100   | 2.9103   | 139.00  |
| N6-H6B...O1   | 0.8600 | 2.0300   | 2.8744   | 169.00  |
| N7-H7B...O1   | 0.8900 | 2.5700   | 3.3018   | 140.00  |
| N7-H7C...N3   | 0.8900 | 2.4100   | 3.2610   | 161.00  |
| N8-H8...N10   | 0.8600 | 2.3100   | 2.6536   | 104.00  |
| N8-H8...N5    | 0.8600 | 2.1900   | 2.9927   | 155.00  |
| N9-H9...N4    | 0.8600 | 2.0800   | 2.9305   | 173.00  |
| N10-H10B...N2 | 0.8900 | 2.4100   | 3.2046   | 148.00  |
| N10-H10C...O1 | 0.8900 | 2.3200   | 3.1064   | 148.00  |

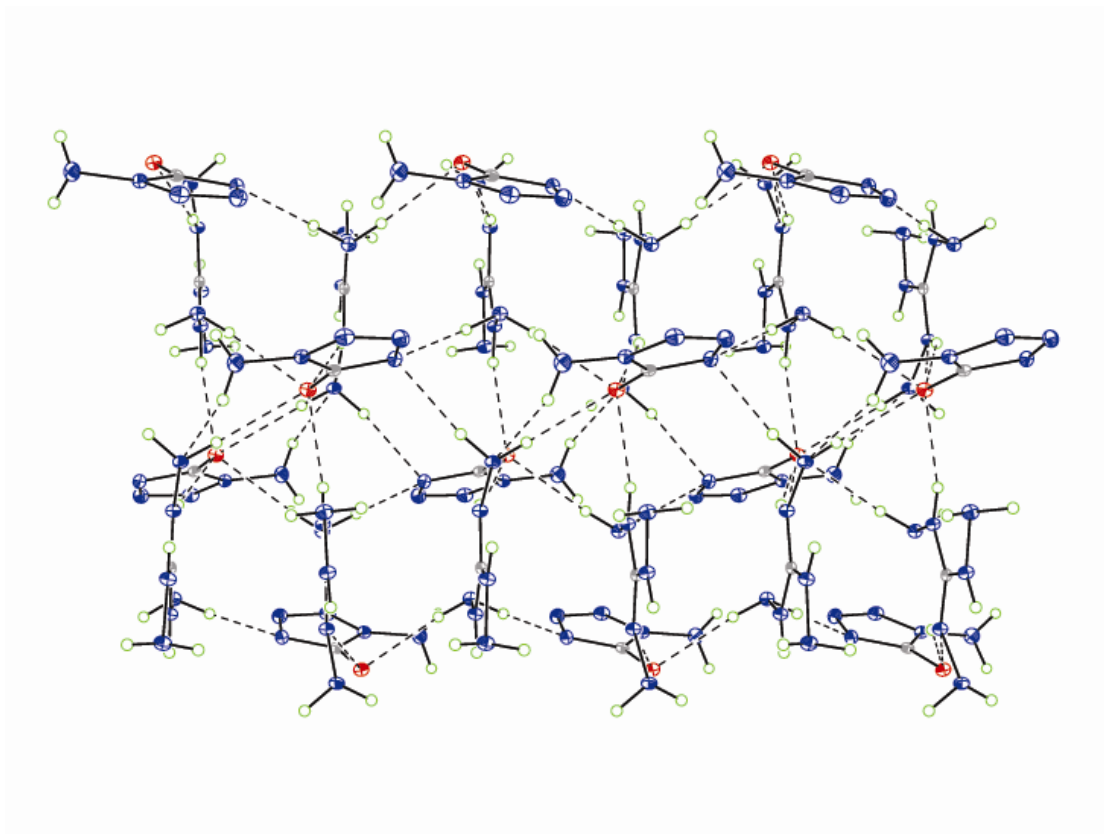

**Figure S32.** Packing diagram of **7e** viewed down the *c* axis

**Table S7.** Hydrogen bond lengths(Å) and bond angles(°) of **7e**

| D-H...A      | d(D-H) | d(H...A) | d(D...A) | D-H...A |
|--------------|--------|----------|----------|---------|
| N2-H2...N7   | 0.8600 | 2.5200   | 3.2887   | 148.00  |
| N9-H4...N6   | 0.8400 | 2.3200   | 2.6480   | 104.00  |
| N9-H4...O1   | 0.8400 | 2.1000   | 2.8510   | 149.00  |
| N6-H5...O1   | 0.9100 | 2.2900   | 3.2017   | 174.00  |
| N6-H6...N4   | 0.9300 | 2.2400   | 3.1512   | 164.00  |
| N10-H7...N11 | 0.8800 | 2.3500   | 2.6725   | 102.00  |
| N10-H7...O1  | 0.8800 | 2.1600   | 3.0043   | 159.00  |
| N7-H8...N4   | 0.9200 | 2.1800   | 3.0596   | 162.00  |
| N7-H9...O1   | 0.9000 | 2.2700   | 3.1430   | 163.00  |
| N8-H10...N3  | 0.8500 | 2.3600   | 3.0930   | 146.00  |
| N8-H10...N7  | 0.8500 | 2.2800   | 2.6381   | 105.00  |
| N11-H11...N5 | 0.9100 | 2.4000   | 3.2948   | 166.00  |
| N11-H12...N2 | 0.8900 | 2.3200   | 3.0337   | 136.00  |

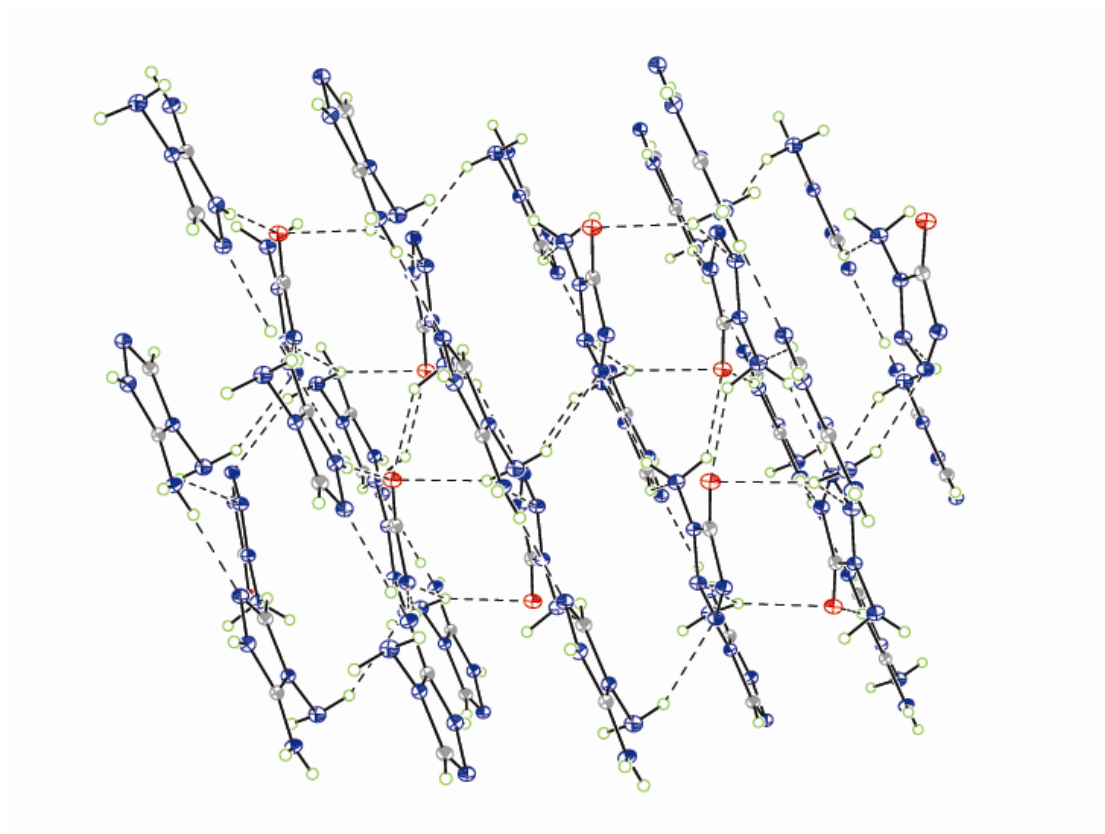

**Figure S33.** Packing diagram of **7f** viewed down the *c* axis

**Table S8.** Hydrogen bond lengths(Å) and bond angles(°) of **7f**

| D-H...A       | d(D-H) | d(H...A) | d(D...A) | D-H...A |
|---------------|--------|----------|----------|---------|
| N5-H5A...N3   | 0.8900 | 2.5000   | 3.3128   | 152.00  |
| N5-H5B...O1   | 0.8900 | 2.3100   | 3.0268   | 138.00  |
| N7-H7...O1    | 0.8600 | 1.8300   | 2.6624   | 163.00  |
| N9-H9A...N3   | 0.8900 | 2.4000   | 3.2320   | 156.00  |
| N9-H9B...O1   | 0.8900 | 2.3400   | 3.1688   | 155.00  |
| N9-H9B...N2   | 0.8900 | 2.6000   | 3.0233   | 110.00  |
| N10-H10A...N4 | 0.8600 | 2.0300   | 2.8652   | 162.00  |
| N10-H10B...N6 | 0.8600 | 2.0700   | 2.8966   | 162.00  |
| N10-H10B...N9 | 0.8600 | 2.5600   | 2.8454   | 100.00  |

## TG data

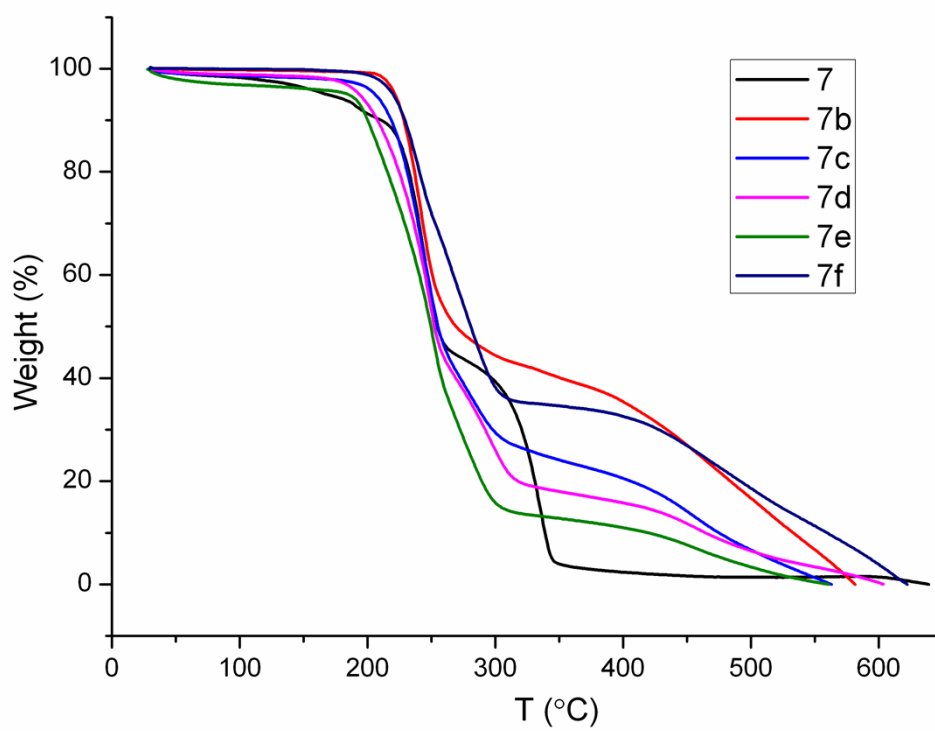

Figure S34. TG data of 7,7b~7f.
